# Supplementary material for: An Adaptable N‐Heterocyclic Carbene Macrocycle Hosting Copper in Three Oxidation States
Source: PubMed Central journal article supplement — Angew Chem Int Ed Engl. 2020 Jan 24;59(14):5696–705. doi: 10.1002/anie.201912745 (PMC7154638; doi:10.1002/anie.201912745), 2020-01-24
Supplement: ANIE-59-5696-s001.pdf [file ANIE-59-5696-s001.pdf]

## Supporting Information

### **An Adaptable N-Heterocyclic Carbene Macrocycle Hosting Copper in Three Oxidation States**

*Yang Liu, Stefan G. Resch, Iris Klawitter, George E. Cutsail III, Serhiy Demeshko, Sebastian Dechert, Fritz E. Kühn, Serena DeBeer, and Franc Meyer\**

anie\_201912745\_sm\_miscellaneous\_information.pdf

**Table of Contents**

|                                               |    |
|-----------------------------------------------|----|
| 1. Experimental Procedures                    | 2  |
| 2. Crystallographic Data                      | 5  |
| 3. Equilibrium between <b>1</b> and <b>1'</b> | 10 |
| 4. UV-vis Spectra of <b>1–3</b>               | 11 |
| 5. IR Spectra of <b>1–3</b>                   | 13 |
| 6. ESI Mass Spectra of <b>1</b> and <b>2</b>  | 14 |
| 7. Cyclic Voltammogram of <b>1</b>            | 15 |
| 8. EPR Spectrum of <b>2</b> at 147 K          | 16 |
| 9. SQUID Magnetometry of <b>2</b>             | 17 |
| 10. NMR Spectra                               | 18 |
| 11. Variable-Temperature NMR Spectra          | 30 |
| 12. DFT Calculations                          | 35 |
| 13. References                                | 42 |

## Experimental Procedures

**General Considerations.** All manipulations on air- and moisture-sensitive materials were performed under an atmosphere of dry dinitrogen with the rigid exclusion of air and moisture using standard Schlenk or cannula techniques, or in a glovebox. Solvents were dried with sodium (Et<sub>2</sub>O, THF and Hexane) in the presence of benzophenone or CaH<sub>2</sub> (MeCN) and freshly distilled and degassed prior use. [D<sub>3</sub>]MeCN was dried with 3 Å molecular sieves. [D<sub>6</sub>]Acetone was dried with dry K<sub>2</sub>CO<sub>3</sub>, and freshly distilled and degassed prior use. [H<sub>2</sub>L](PF<sub>6</sub>)<sub>2</sub>,<sup>[1]</sup> [MesCu],<sup>[2]</sup> [Cu(NCMe)<sub>4</sub>](PF<sub>6</sub>)<sup>[3]</sup>, [Cp<sub>2</sub>Fe](PF<sub>6</sub>)<sup>[4]</sup> and [(2,4-Br<sub>2</sub>-C<sub>6</sub>H<sub>3</sub>)<sub>3</sub>N](SbF<sub>6</sub>)<sup>[5]</sup> were synthesized according to literature procedures, and K[N(SiMe<sub>3</sub>)<sub>2</sub>] was purchased from Sigma-Aldrich Corporation. <sup>1</sup>H, <sup>13</sup>C, <sup>31</sup>P and <sup>19</sup>F NMR spectra were recorded with Bruker 300 MHz, 400 MHz or 500 MHz spectrometer. All chemical shifts were reported in units of ppm with references to the residual protons of the deuterated solvents for proton chemical shifts, the <sup>13</sup>C of deuterated solvents for carbon chemical shifts, the <sup>19</sup>F of CFCl<sub>3</sub> (external standard) for fluorine chemical shifts, and the <sup>31</sup>P of 85% phosphorous acid (external standard) for phosphine chemical shifts. ESI mass spectra were recorded on Bruker HCT ultra spectrometer. Elemental analyses were performed by the analytical laboratory of the Institute of Inorganic Chemistry at the University of Göttingen using an Elementar Vario EL III instrument. UV-vis spectra were recorded with an Agilent Cary 60 equipped with a Unisoku Cryostat (CoolSpek) and magnetic stirrer using quartz cuvettes with an attached tube and a screw cap with a septum. IR spectra were recorded inside a glovebox on a Cary 630 FTIR spectrometer equipped with Dial Path Technology and analyzed by FTIR MicroLab software.

**Electrochemistry.** Cyclic voltammetry (CV) experiments were performed in a glovebox under an argon atmosphere with an Interface 1000B potentiostat. A glassy carbon was used as working electrode, a platinum wire was used as the auxiliary electrode, and an Ag reference electrode was used as the reference electrode. 0.1 M [(*n*-Bu)<sub>4</sub>N](PF<sub>6</sub>) in CH<sub>3</sub>CN was used as supporting electrolyte and was prepared in the glovebox. Ferrocene was used as an internal standard. The data were analyzed by Gamry Framework software.

**(Spectro)electrochemistry.** (Spectro)electrochemistry experiments were performed in a glovebox under an argon atmosphere with an Interface 1000B potentiostat, Deuterium/Tungsten light source (BWTEK), Exemplar LS spectrometer (BWTEK), and quartz cuvettes. A platinum mesh was used as working electrode, a platinum wire was used as the auxiliary electrode, and an Ag reference electrode was used as the reference electrode. 0.1 M [(*n*-Bu)<sub>4</sub>N](PF<sub>6</sub>) in MeCN was used as supporting electrolyte and was prepared in the glovebox. The potential was controlled by Gamry Framework software, and the data was analyzed by BWSpec software.

**Magnetic Measurements.** Temperature-dependent magnetic susceptibility measurements for **2** were carried out with a Quantum-Design MPMS-XL-5 SQUID magnetometer equipped with a 5 T magnet in the range from 295–2.0 K at a magnetic field of 0.5 T. The crystalline solid sample was contained in a gelatin capsule and fixed in a nonmagnetic sample holder. Each raw data file for the measured magnetic moment was corrected for the diamagnetic contribution of the capsule according to  $M^{dia} = \chi_g \times m \times H$ , with experimentally obtained gram susceptibilities of the capsule. The molar susceptibility data of the compounds were corrected for the diamagnetic contribution. Experimental data for **2** were modelled with the julX program<sup>[6]</sup> using a fitting procedure to the spin Hamiltonian:  $\hat{H} = g\mu_B \vec{B} \cdot \vec{S}$ . Temperature-independent paramagnetism (TIP = 25 · 10<sup>-6</sup> cm<sup>3</sup> · mol<sup>-1</sup>) was included according to  $\chi_{calc} = \chi_{exp} + TIP$ .

**EPR Spectroscopy.** EPR spectra were measured with a Bruker E500 ELEXSYS X-band spectrometer equipped with a standard cavity (ER4102ST, 9.45 GHz). The sample temperature was maintained constant with an Oxford instrument nitrogen flow cryostat (ESP910) and an Oxford temperature controller (ITC-4). The microwave frequency was measured with the built-in frequency counter, and the magnetic field was calibrated by using an NMR field probe (Bruker ER035M). EPR spectra were simulated using EasySpin.<sup>[7]</sup>

**X-Ray Structure Determination.** Crystal data and details of the data collections are given in Table S1, selected bond lengths and angles are given in Table S2, molecular structures are shown in Figures S1-S4. X-ray data were collected on a STOE IPDS II diffractometer (graphite monochromated Mo-K $\alpha$  radiation,  $\lambda = 0.71073$  Å) by use of scans at -140 °C. The structures were solved with SHELXT and refined on  $F^2$  using all reflections with SHELXL-2018.<sup>[8]</sup> Non-hydrogen atoms were refined anisotropically. Hydrogen atoms were placed in calculated positions and assigned to an isotropic displacement parameter of 1.2  $U_{eq}$ (C). Counterions in **1** (PF<sub>6</sub><sup>-</sup>) and **3** (PF<sub>6</sub><sup>-</sup>/SbF<sub>6</sub><sup>-</sup>) were found to be disordered. In case of **3** three SbF<sub>6</sub><sup>-</sup> and three PF<sub>6</sub><sup>-</sup> occupy the same positions. Occupancy factors for **1** are 0.838(3) / 0.162(3), and for **3**: 0.925(2) (PF<sub>6</sub><sup>-</sup>) / 0.075(2) (SbF<sub>6</sub><sup>-</sup>), 0.909(2) (PF<sub>6</sub><sup>-</sup>) / 0.091(2) (SbF<sub>6</sub><sup>-</sup>), 0.780(7) (PF<sub>6</sub><sup>-</sup>) / 0.220(7) (PF<sub>6</sub><sup>-</sup>), 0.330(2) (SbF<sub>6</sub><sup>-</sup>) / 0.670(2) (PF<sub>6</sub><sup>-</sup>). DFIX ( $d_{Sb-F} = 1.86$  Å), SADI ( $d_{F...F}$ ), RIGU and SAME restraints in case of **3** and EADP constraints in case of **1** and **3** were applied to model the disordered parts. Face-indexed absorption corrections were performed numerically with the program X-RED.<sup>[9]</sup>

**X-Ray Spectroscopic Measurements.** X-ray spectroscopic measurements were performed at beam line 6-2 at SSRL (3.0 GeV, 500 mA) in a 10 K in a liquid helium cryostat. Cu K $\beta$  HERFD-XAS were collected using a Si(311) double crystal monochromator upstream for energy selection and a 1 m radius Johann spectrometer for the measurement of X-ray emission equipped with seven Si(531) analyzer crystals and a silicon-drift detector windowed to K $\beta$  emission region. The incident energy was calibrated to the first inflection point of a Cu reference foil set to an energy of 8980.3 eV. The emission spectrometer was calibrated with numerous elastic scattering scans throughout the Cu K $\beta$  emission region post monochromator calibration. A beam size of approximately 400 (h) x 100 (v)  $\mu$ m was

## SUPPORTING INFORMATION

used. Cu K $\beta$  HERFD-XAS was collected by selection at the maximum of the Cu K $\beta$  emission spectrum (~8904 eV) and sweeping the incident energy on a fresh sample spot. Data was collected in 0.25 eV step sizes in the XANES region (8976 to 9000 eV) and a larger 1.0 eV step sizes below 8976 eV and above 9000 eV. All samples were monitored for radiation damage by evaluation of the pre-edge (when present) and the edge energies and structures. The sample exposure time was limited and incident flux was attenuated to eliminate the observation of radiation damage and optimize data collection conditions.

All data was processed in an equivalent manner in Matlab (Mathworks Inc.). The averaged scans were normalized for an edge-jump of 1. Pre-edge features were fit by subtraction of the edge region from the pre-edge region by constraining a single pseudo-Voigt line shape to the pre-edge region and fitting the XANES region to multiple pseudo-Voigt line shapes, similar to previously described methods.<sup>[10]</sup>

**Computational Details.** The ORCA program package (version 3.0.3) was employed for all calculations.<sup>[11]</sup> Geometry optimization of the cations were performed starting from the crystallographic data of **1–3** (BP86 functional, def2-tzvp basis set,<sup>[12]</sup> RI approximation using the auxiliary def2-tzvp/J basis set, D3 dispersion correction with Becke-Johnson damping,<sup>[13]</sup> tight convergence and optimization criteria) at different spin states (spin restricted calculations in case of closed-shell molecules, otherwise spin unrestricted calculations, unless otherwise stated). Single point energies were calculated on the optimized coordinates by using B3LYP functional and the RIJCOSX approximation with the same basis sets and dispersion correction as stated above. The relative energies and selected bond lengths are given in Table 2. The transition state of **1** was calculated using the OptTS feature of ORCA. A single imaginary frequency at  $-33.97\text{ cm}^{-1}$  was found for the transition state. TD-DFT calculations were carried out at the B3LYP/def2-tzvp level of theory (number of roots = 80) as well as the Broken-Symmetry calculations. The coupling constant  $J$ , was calculated according to Yamaguchi.<sup>[14]</sup> XAS spectra were calculated in ORCA (v 4.1) as previously reported<sup>[10]</sup> via application of time-dependent density functional theory (TDDFT) using the BP86 optimized geometries, but employing the PBE0 functional. The calculation was limited to the pre-edge region with 150 roots calculated. All spectra were broadened with a Gaussian line shape of 1.4 eV (FWHM).

**Preparation of [LCu](PF<sub>6</sub>) (**1**).** *Method A:* At room temperature, to a MeCN (30 mL) solution of [H<sub>2</sub>L](PF<sub>6</sub>)<sub>2</sub> (740 mg, 1.16 mmol) was slowly added mesitylcopper (440 mg, 2.41 mmol). The suspension was heated to 60 °C for one week, and during this time the color of the suspension changed from white to yellow. After filtration, the resulting yellow solid was washed with THF or Et<sub>2</sub>O (2 mL  $\times$  3) and dried under vacuum to leave **1** as a yellow powder (420 mg, 66%). *Method B:* At  $-35\text{ }^{\circ}\text{C}$ , to a MeCN (20 mL) solution of [H<sub>2</sub>L](PF<sub>6</sub>)<sub>2</sub> (400 mg, 0.63 mmol) was slowly added K[N(SiMe<sub>3</sub>)<sub>2</sub>] (251 mg, 1.26 mmol). The color of the solution changed from colorless to red immediately. Then [Cu(NCMe)<sub>4</sub>](PF<sub>6</sub>) (235 mg, 0.63 mmol) was added, and the color of the solution changed from red to yellow quickly along with the generation of a white precipitate. The reaction mixture was warmed to 60 °C and stirred for one week, and during this time the white precipitate disappeared and the formation of a yellow precipitate was observed. After filtration, the resulting yellow solid was washed with THF (2 mL  $\times$  3) and dried under vacuum to give **1** as a yellow powder (230 mg, 66%). Single-crystals of **1** suitable for X-ray diffraction studies were grown by diffusing Et<sub>2</sub>O into a saturated MeCN solution at room temperature. <sup>1</sup>H NMR (400 MHz, [D<sub>3</sub>]MeCN, 298 K):  $\delta$  (ppm) 7.75 (t,  $J = 7.6\text{ Hz}$ , 2H, *CH-p*-Py), 7.34 (d,  $J = 7.6\text{ Hz}$ , 4H, *CH-m*-Py), 6.96 (s, 4H, *CH-imidazolyl* backbone), 5.20 (s, 8H, *CH<sub>2</sub>-linkers*). <sup>13</sup>C NMR (100 MHz, [D<sub>3</sub>]MeCN, 298 K):  $\delta$  (ppm) 177.4 (NCN), 154.9 (*CH-o*-Py), 138.7 (*CH-p*-Py), 122.9 (*CH-m*-Py), 121.7 (*CH-imidazolyl* backbone), 55.2 (*CH<sub>2</sub>-linkers*). <sup>19</sup>F NMR (283 MHz, [D<sub>3</sub>]MeCN, 298 K):  $\delta$  (ppm)  $-72.9$  (d,  $J_{\text{P-F}} = 708.1\text{ Hz}$ ). <sup>31</sup>P NMR (122 MHz, [D<sub>3</sub>]MeCN, 298 K):  $\delta$  (ppm)  $-144.6$  (hepta,  $J_{\text{P-P}} = 709.3\text{ Hz}$ ). Anal. Calcd. for C<sub>20</sub>H<sub>18</sub>CuN<sub>6</sub>PF<sub>6</sub>: C 43.60, H 3.29, N 15.25; Found: C 43.72, H 3.35, N 15.26. ESI-MS (MeCN)  $m/z$  (%): 405.1 (100) [CuC<sub>20</sub>H<sub>18</sub>N<sub>6</sub>]<sup>+</sup>. Absorption spectrum (in CH<sub>3</sub>CN):  $\lambda_{\text{max}}$ , nm ( $\epsilon$ , M<sup>-1</sup>·cm<sup>-1</sup>) 260 (15670), 280 (13580), 340 (4960). ATR-IR (powder, cm<sup>-1</sup>):  $\nu = 3129$  (w), 1594 (w), 1578 (w), 1570 (w), 1560 (w), 1463 (w), 1452 (w), 1409 (w), 1390 (w), 1328(w), 1287 (w), 1267 (w), 1240 (w), 1200(w), 1164 (w), 1111 (w), 1095 (w), 1089 (w), 999 (w), 943 (w), 934 (w), 876 (w), 845 (s), 826 (s), 775 (m), 758 (m), 750 (m), 731 (m), 721 (s), 672 (m), 606 (m), 555 (s), 443 (w). Few colorless crystals that turned out to be the dinuclear complex [L<sub>2</sub>Cu<sub>2</sub>](PF<sub>6</sub>)<sub>2</sub> (**1'**) were also formed during the crystallization.

**Preparation of [L<sub>2</sub>Cu<sub>2</sub>](PF<sub>6</sub>)<sub>2</sub> (**1'**).** During the synthesis of complex **1** via method B, a white precipitate was generated after the addition of [Cu(NCMe)<sub>4</sub>](PF<sub>6</sub>). The white precipitate was collected by filtration, washed with THF (2 mL) and dried under vacuum to give **1'** as a white solid. The IR (solid) spectrum of this white solid is essentially identical with the spectrum of the colorless crystals of **1'** obtained during the crystallization of **1**. ATR-IR (powder, cm<sup>-1</sup>):  $\nu = 3178$  (w), 3152 (w), 1600 (w), 1578 (w), 1571 (w), 1457 (w), 1432 (w), 1420 (w), 1375 (w), 1361 (w), 1346 (w), 1252 (w), 1243(w), 1207 (w), 1193 (w), 1176 (w), 1167 (w), 1157 (w), 1124 (w), 1114 (w), 1101 (w), 1094 (w), 1051 (w), 1032 (w), 996 (w), 992 (w), 949 (w), 877 (w), 852 (m), 834 (s), 784 (m), 756 (m), 734 (s), 712 (w), 666 (w), 657 (w), 642 (w), 634 (w), 611 (w), 604 (w), 592 (w), 556 (s), 527 (w), 482 (w), 453 (w). Further characterization of **1'** in solution state was not possible due to the immediate conversion into **1** in solution.

**Preparation of [LCu](PF<sub>6</sub>)<sub>2</sub> (**2**).** At  $-35\text{ }^{\circ}\text{C}$ , to a MeCN (5 mL) solution of [LCu](PF<sub>6</sub>) (**1**, 120 mg, 0.22 mmol) was slowly added [Cp<sub>2</sub>Fe](PF<sub>6</sub>) (72 mg, 0.22 mmol). The color of the solution changed from yellow to red immediately. The reaction mixture was stirred for 30 min at room temperature and then subjected to vacuum to remove all the volatiles. The resulting red solid was washed with *n*-hexanes (3 mL  $\times$  3) until the washing liquid becomes almost colorless, then extracted with MeCN (3 mL) and filtered. The red crystals of **2** (139 mg, 86%) were obtained by slow diffusion of Et<sub>2</sub>O to this MeCN solution at room temperature. Anal. Calcd. for C<sub>20</sub>H<sub>18</sub>CuN<sub>6</sub>P<sub>2</sub>F<sub>12</sub>: C 34.52, H 2.61, N 12.08; Found: C 34.62, H 2.39, N 12.08 (The coordinated MeCN has been removed after 12 h under high vacuum). ESI-MS (MeCN)  $m/z$  (%): 549.9 (100) [C<sub>20</sub>H<sub>18</sub>CuN<sub>6</sub>PF<sub>6</sub>]<sup>+</sup>, 202.2 (78%) [C<sub>20</sub>H<sub>18</sub>CuN<sub>6</sub>]<sup>2+</sup>. Absorption spectrum (in CH<sub>3</sub>CN):  $\lambda_{\text{max}}$ , nm ( $\epsilon$ , M<sup>-1</sup>·cm<sup>-1</sup>) 260 (18230), 370 (220), 490 (120). ATR-IR (powder, cm<sup>-1</sup>):  $\nu = 3152$  (w), 1601 (w), 1577 (w), 1568 (w), 1491 (w), 1451 (w), 1439 (w), 1427 (w), 1385 (w), 1345(w), 1323 (w), 1284 (w), 1270 (w), 1205 (w), 1185 (w), 1175 (w), 1115 (w),

## SUPPORTING INFORMATION

1058 (w), 1006 (w), 982 (w), 971 (w), 942 (w), 911 (w), 824 (s), 781 (s), 765 (s), 736 (s), 657 (m), 626 (m), 613 (m), 599 (m), 554 (s), 409 (w) (no peak due to MeCN around 2200 cm<sup>-1</sup> was observed, indicating the removal of CH<sub>3</sub>CN under high vacuum).

**Preparation of [LCu](PF<sub>6</sub>)<sub>2</sub>(SbF<sub>6</sub>) (3).** At -35 °C, to a MeCN (2 mL) solution of [LCu](PF<sub>6</sub>)<sub>2</sub> (2, 81 mg, 0.11 mmol) was slowly added [2,4-Br<sub>2</sub>-C<sub>6</sub>H<sub>3</sub>](SbF<sub>6</sub>) (104 mg, 0.11 mmol). The color of the solution changed from red to dark-red immediately. The reaction mixture was stirred for 30 min at room temperature, and was then filtered. Dark-red crystals of **3** were obtained by slow diffusion of Et<sub>2</sub>O into the filtrate at room temperature. After recrystallizing twice, **3** was obtained in good purity (60 mg, 60%). <sup>1</sup>H NMR (500 MHz, [D<sub>3</sub>]MeCN, 298 K): δ (ppm) 8.44 (t, *J* = 7.5 Hz, 2H, *CH-p*-Py), 8.07 (d, *J* = 7.6 Hz, 4H, *CH-m*-Py), 7.67 (s, 4H, *CH*-imidazolyl backbone), 5.97 (s, 8H, *CH*<sub>2</sub>-linkers). <sup>1</sup>H NMR (400 MHz, [D<sub>6</sub>]acetone, 298 K): δ (ppm) 8.71 (t, *J* = 7.6 Hz, 2H, *CH-p*-Py), 8.41 (d, *J* = 7.6 Hz, 4H, *CH-m*-Py), 8.03 (s, 4H, *CH*-imidazolyl backbone), 6.45/6.02 (ABq, 8H, *J* = 16.8 Hz, *CH*<sub>2</sub>-linkers). <sup>13</sup>C NMR (125 MHz, [D<sub>3</sub>]MeCN, 298 K): δ (ppm) 153.7 (*CH-o*-Py), 151.8 (NCN), 145.6 (*CH-p*-Py), 131.1 (*CH-m*-Py), 125.5 (*CH*-imidazolyl backbone), 55.7 (*CH*<sub>2</sub>-linkers). <sup>19</sup>F NMR (471 MHz, [D<sub>3</sub>]MeCN, 298 K): δ (ppm) -72.7 (d, *J*<sub>F-P</sub> = 707.4 Hz), no <sup>19</sup>F signal of [SbF<sub>6</sub>] was observed, possibly due to the <sup>121/123</sup>Sb (*I* = 5/2, 7/2) nuclei. <sup>31</sup>P NMR (203 MHz, [D<sub>3</sub>]MeCN, 298 K): δ (ppm) -144.6 (hepta, *J*<sub>F-P</sub> = 708.7 Hz). Anal. Calcd. for C<sub>20</sub>H<sub>18</sub>CuN<sub>6</sub>P<sub>2.75</sub>Sb<sub>0.25</sub>F<sub>18</sub>: C 27.82, H 2.10, N 9.73; Found: C 28.08, H 2.18, N 9.95 (The found elemental analysis data is consistent with the composition observed by X-ray diffraction analysis, assuming that the coordinated MeCN has been removed after 12 h under high vacuum). Absorption spectrum (in MeCN): λ<sub>max</sub>, nm (ε, M<sup>-1</sup>·cm<sup>-1</sup>) 260 (25460), 300 (6900), 350 (2900), 530 (290). ATR-IR (powder, cm<sup>-1</sup>): ν = 3169 (w), 3148 (w), 1604 (w), 1567 (w), 1530 (w), 1470 (w), 1443 (w), 1383 (w), 1334 (w), 1266 (w), 1219 (w), 1190 (w), 1179 (w), 1115 (w), 1078(w), 815 (s), 782 (s), 737 (s), 658 (m), 553 (s), 453 (w), 431 (w) (no peak due to MeCN around 2200 cm<sup>-1</sup> was observed, indicating the removal of MeCN under high vacuum).

## SUPPORTING INFORMATION

## 1. Crystallographic Data

Table S1. Crystal data and refinement details for 1, 2, and 3.

| Compound                                                      | 1(y055)                                                                                       | 1'(y19)                                                                                                           | 2(y13)                                                                                                                                 | 3(y15)                                                                                                                                                                               |
|---------------------------------------------------------------|-----------------------------------------------------------------------------------------------|-------------------------------------------------------------------------------------------------------------------|----------------------------------------------------------------------------------------------------------------------------------------|--------------------------------------------------------------------------------------------------------------------------------------------------------------------------------------|
| empirical formula                                             | C <sub>20</sub> H <sub>18</sub> CuF <sub>6</sub> N <sub>6</sub> P                             | C <sub>40</sub> H <sub>36</sub> Cu <sub>2</sub> F <sub>12</sub> N <sub>12</sub> P <sub>2</sub>                    | C <sub>24</sub> H <sub>24</sub> CuF <sub>12</sub> N <sub>6</sub> P <sub>2</sub>                                                        | C <sub>52</sub> H <sub>54</sub> Cu <sub>2</sub> F <sub>36</sub> N <sub>18</sub> P <sub>5.50</sub> Sb <sub>0.50</sub>                                                                 |
| moiety formula                                                | C <sub>20</sub> H <sub>18</sub> CuN <sub>6</sub> <sup>+</sup> , F <sub>6</sub> P <sup>-</sup> | C <sub>40</sub> H <sub>36</sub> Cu <sub>2</sub> N <sub>12</sub> <sup>2+</sup> , 2(F <sub>6</sub> P <sup>-</sup> ) | C <sub>22</sub> H <sub>21</sub> CuN <sub>7</sub> <sup>2+</sup> , 2(F <sub>6</sub> P <sup>-</sup> ),<br>C <sub>2</sub> H <sub>3</sub> N | 2(C <sub>22</sub> H <sub>21</sub> CuN <sub>7</sub> <sup>3+</sup> ), 5.5(F <sub>6</sub> P <sup>-</sup> ),<br>0.5(F <sub>6</sub> Sb <sup>-</sup> ), 4(C <sub>2</sub> H <sub>3</sub> N) |
| formula weight                                                | 550.91                                                                                        | 1101.83                                                                                                           | 777.99                                                                                                                                 | 1973.01                                                                                                                                                                              |
| crystal size [mm <sup>3</sup> ]                               | 0.50 x 0.24 x 0.14                                                                            | 0.24 x 0.13 x 0.10                                                                                                | 0.50 x 0.19 x 0.16                                                                                                                     | 0.50 x 0.37 x 0.26                                                                                                                                                                   |
| crystal system                                                | triclinic                                                                                     | Orthorhombic                                                                                                      | orthorhombic                                                                                                                           | triclinic                                                                                                                                                                            |
| space group                                                   | <i>P</i> -1 (No. 2)                                                                           | <i>Pbcn</i> (No. 60)                                                                                              | <i>Pbca</i> (No. 61)                                                                                                                   | <i>P</i> -1 (No. 2)                                                                                                                                                                  |
| <i>a</i> [Å]                                                  | 9.5890(5)                                                                                     | 23.3578(9)                                                                                                        | 8.74300(10)                                                                                                                            | 11.3010(3)                                                                                                                                                                           |
| <i>b</i> [Å]                                                  | 10.0003(5)                                                                                    | 11.4032(5)                                                                                                        | 18.0411(4)                                                                                                                             | 16.8936(5)                                                                                                                                                                           |
| <i>c</i> [Å]                                                  | 11.3343(5)                                                                                    | 16.3860(8)                                                                                                        | 37.1179(6)                                                                                                                             | 20.2152(6)                                                                                                                                                                           |
| $\alpha$ [°]                                                  | 105.425(4)                                                                                    | 90                                                                                                                | 90                                                                                                                                     | 76.107(2)                                                                                                                                                                            |
| $\beta$ [°]                                                   | 92.439(4)                                                                                     | 90                                                                                                                | 90                                                                                                                                     | 78.407(2)                                                                                                                                                                            |
| $\gamma$ [°]                                                  | 91.778(4)                                                                                     | 90                                                                                                                | 90                                                                                                                                     | 87.214(2)                                                                                                                                                                            |
| <i>V</i> [Å <sup>3</sup> ]                                    | 1045.77(9)                                                                                    | 4364.5(3)                                                                                                         | 5854.73(17)                                                                                                                            | 3670.05(19)                                                                                                                                                                          |
| <i>Z</i>                                                      | 2                                                                                             | 4                                                                                                                 | 8                                                                                                                                      | 2                                                                                                                                                                                    |
| $\rho$ [g·cm <sup>-3</sup> ]                                  | 1.750                                                                                         | 1.677                                                                                                             | 1.765                                                                                                                                  | 1.785                                                                                                                                                                                |
| <i>F</i> (000)                                                | 556                                                                                           | 2224                                                                                                              | 3128                                                                                                                                   | 1964                                                                                                                                                                                 |
| $\mu$ [mm <sup>-1</sup> ]                                     | 1.197                                                                                         | 1.147                                                                                                             | 0.965                                                                                                                                  | 1.021                                                                                                                                                                                |
| <i>T</i> <sub>min</sub> / <i>T</i> <sub>max</sub>             | 0.4032 / 0.5806                                                                               | 0.7172 / 0.9000                                                                                                   | 0.8660 / 0.9771                                                                                                                        | 0.5261 / 0.8545                                                                                                                                                                      |
| $\theta$ -range [°]                                           | 1.866 – 26.734                                                                                | 1.744 – 26.869                                                                                                    | 2.195 – 25.721                                                                                                                         | 1.242 – 25.804                                                                                                                                                                       |
| <i>hkl</i> -range                                             | ±12, ±12, -13 to 14                                                                           | ±29, ±14, -20 to 18                                                                                               | -10 to 9, ±21, ±45                                                                                                                     | ±13, ±20, ±24                                                                                                                                                                        |
| measured refl.                                                | 14943                                                                                         | 21866                                                                                                             | 62081                                                                                                                                  | 45366                                                                                                                                                                                |
| unique refl. [ <i>R</i> <sub>int</sub> ]                      | 4438 [0.0282]                                                                                 | 4651 [0.1000]                                                                                                     | 5537 [0.0562]                                                                                                                          | 13830 [0.0534]                                                                                                                                                                       |
| obs. refl. ( <i>I</i> > 2 $\sigma$ ( <i>I</i> ))              | 3981                                                                                          | 2806                                                                                                              | 4433                                                                                                                                   | 12181                                                                                                                                                                                |
| data / restr. / param.                                        | 4438 / 0 / 329                                                                                | 4651 / 0 / 307                                                                                                    | 5537 / 0 / 426                                                                                                                         | 13830 / 921 / 1271                                                                                                                                                                   |
| goodness-of-fit ( <i>P</i> )                                  | 1.050                                                                                         | 1.022                                                                                                             | 1.043                                                                                                                                  | 1.048                                                                                                                                                                                |
| <i>R</i> 1, <i>wR</i> 2 ( <i>I</i> > 2 $\sigma$ ( <i>I</i> )) | 0.0328 / 0.0845                                                                               | 0.0449 / 0.0895                                                                                                   | 0.0397 / 0.0980                                                                                                                        | 0.0555 / 0.1521                                                                                                                                                                      |
| <i>R</i> 1, <i>wR</i> 2 (all data)                            | 0.0379 / 0.0876                                                                               | 0.0992 / 0.1080                                                                                                   | 0.0536 / 0.1091                                                                                                                        | 0.0623 / 0.1588                                                                                                                                                                      |
| res. el. dens. [e·Å <sup>-3</sup> ]                           | -0.461 / 0.629                                                                                | -0.323 / 0.435                                                                                                    | -0.365 / 0.596                                                                                                                         | -0.941 / 2.536                                                                                                                                                                       |

Table S2. Selected distances [Å] and angles [°].

|                                     | 1                   | 1'                | 2                   | 3 <sup>[a]</sup>                           |
|-------------------------------------|---------------------|-------------------|---------------------|--------------------------------------------|
| Cu–C                                | 1.939(2) / 1.946(2) | 1.896(3)/1.896(3) | 1.907(3) / 1.909(3) | 1.875(4) / 1.880(4)<br>1.868(4) / 1.868(4) |
| Cu–N <sup>Py</sup>                  | 2.496(2) / 2.706(2) |                   | 2.155(2) / 2.157(3) | 1.972(3) / 1.974(3)<br>1.964(3) / 1.974(3) |
| Cu–N <sup>MeCN</sup>                | -                   |                   | 2.321(3)            | 2.325(4) / 2.315(4)                        |
| C–Cu–C                              | 169.62(8)           | 168.34(15)        | 168.42(13)          | 173.36(17) / 172.55(17)                    |
| N <sup>Py</sup> –Cu–N <sup>Py</sup> | 164.49(5)           |                   | 169.83(9)           | 173.14(13) / 172.25(13)                    |
| Cu–N–C <sup>MeCN</sup>              | -                   |                   | 173.8(3)            | 160.7(4) / 165.9(4)                        |

[a] The asymmetric unit contains two crystallographically independent molecules.

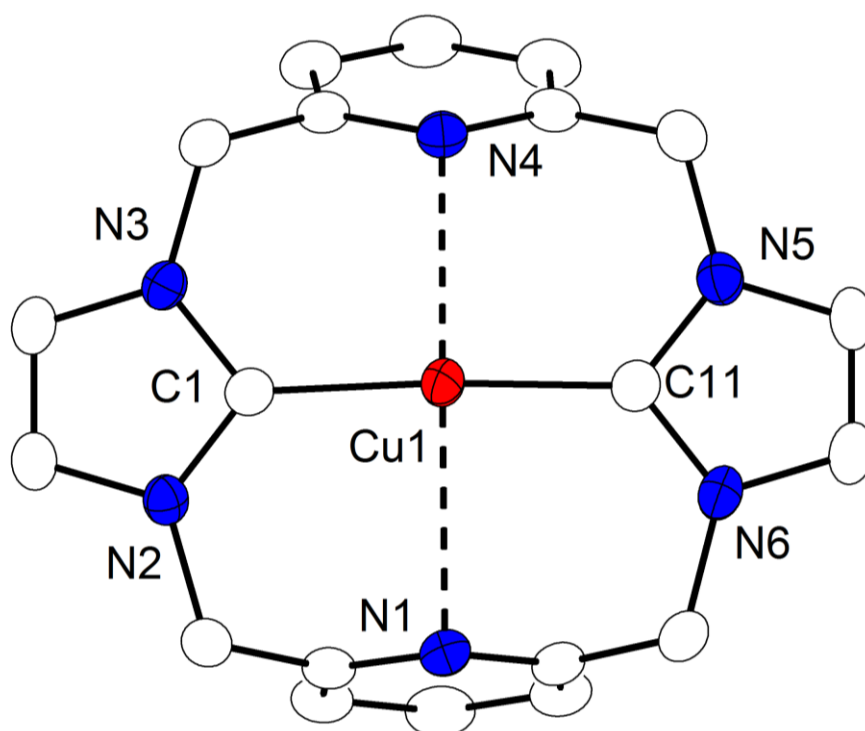

**Figure S1.** Plot (50% probability thermal ellipsoids) of the molecular structure of the cationic part of **1** (hydrogen atoms omitted for clarity). Selected bond lengths [Å] and angles [°]: Cu1–C1 1.939(2), Cu1–C11 1.946(2), Cu1–N1 2.7064(17), Cu1–N4 2.4958(17); C1–Cu1–C11 169.62(8), C1–Cu1–N4 92.15(7), C11–Cu1–N4 90.01(8), C1–Cu1–N1 87.48(7), C11–Cu1–N1 87.73(7), N4–Cu1–N1 164.49(5).

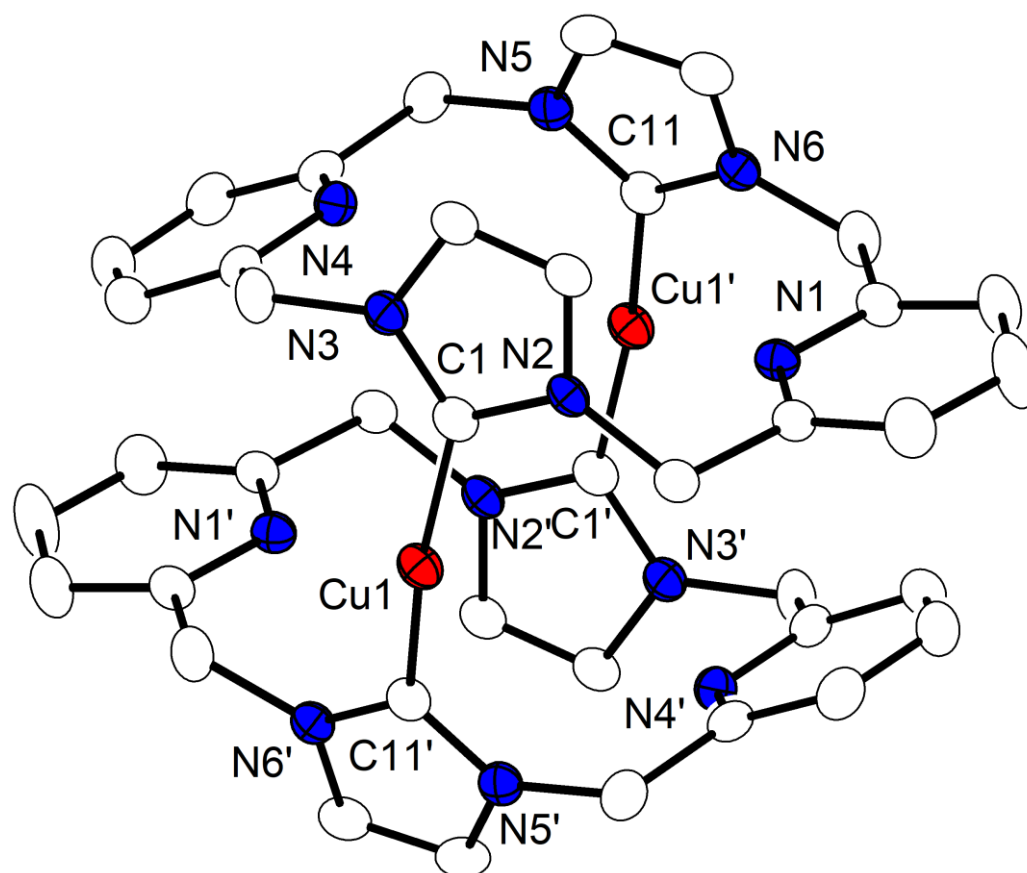

**Figure S2.** Plot (50% probability thermal ellipsoids) of the molecular structure of the cationic part of **1'** (hydrogen atoms omitted for clarity). Selected bond lengths [Å] and angles [°]: Cu1–C1 1.896(3), Cu1–C11' 1.896(3), Cu1⋯Cu1' 5.3486(7); C1–Cu1–C11' 168.34(15). Symmetry transformation used to generate equivalent atoms: (') 1-x, 1-y, 1-z. Note: There is a rather short intermolecular Cu⋯Cu distance of 2.8679(8) Å.



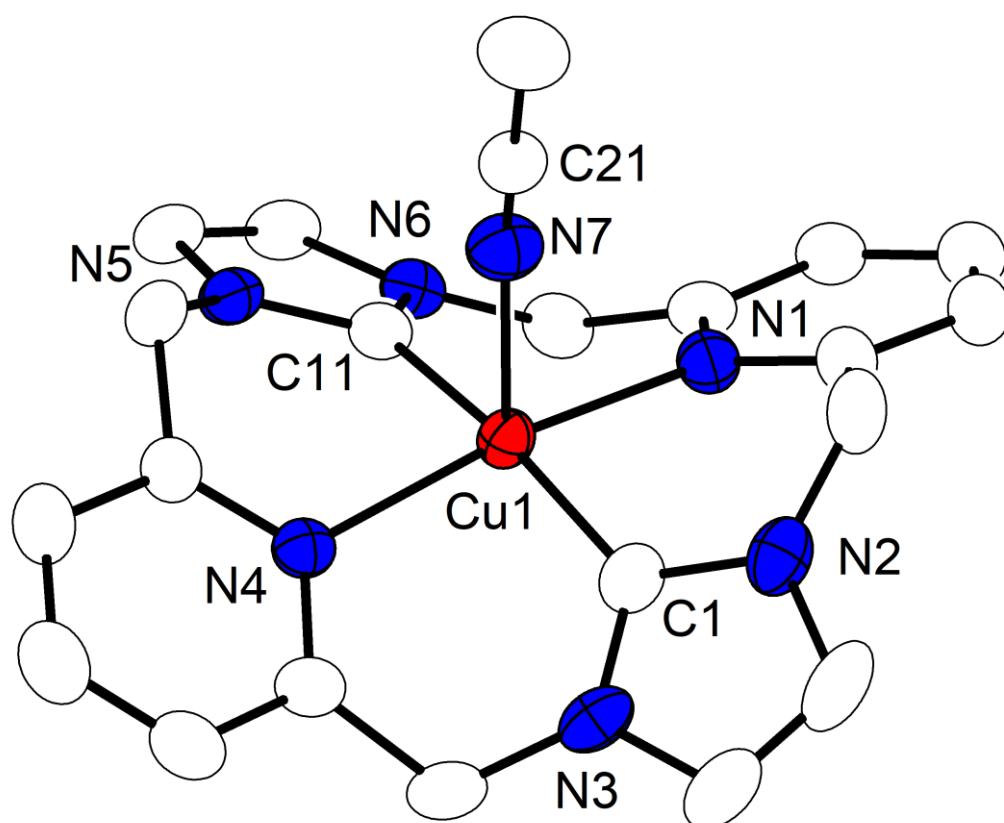

**Figure S3.** Plot (50% probability thermal ellipsoids) of the molecular structure of the cationic part of **2** (hydrogen atoms omitted for clarity). Selected bond lengths [Å] and angles [°]: Cu1–C1 1.909(3), Cu1–C11 1.907(3), Cu1–N1 2.157(3), Cu1–N4 2.155(2), Cu1–N7 2.321(3); C11–Cu1–C1 168.42(13), C11–Cu1–N4 89.37(11), C1–Cu1–N4 89.84(12), C11–Cu1–N1 89.84(11), C1–Cu1–N1 88.91(12), N4–Cu1–N1 169.83(9), C11–Cu1–N7 95.73(11), C1–Cu1–N7 95.85(11), N4–Cu1–N7 93.34(10), N1–Cu1–N7 96.83(10), C21–N7–Cu1 173.8(3).

## SUPPORTING INFORMATION

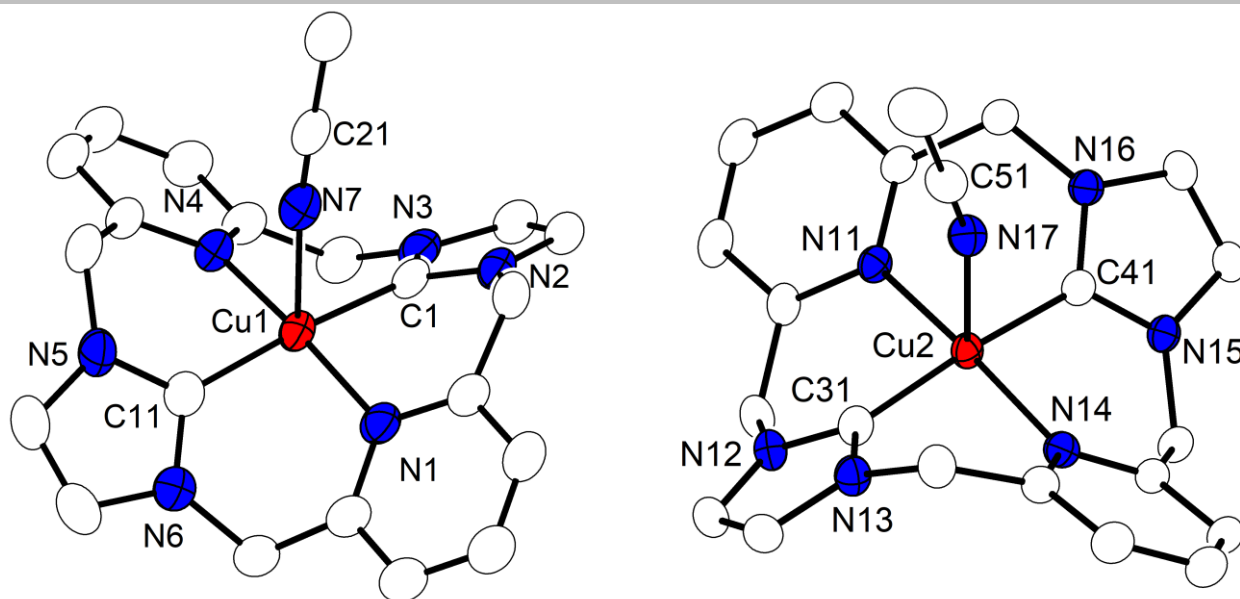

**Figure S4.** Plot (50% probability thermal ellipsoids) of the molecular structure of the cationic part of **3** (left) and **3'** (right) (hydrogen atoms omitted for clarity; **3** and **3'** are two crystallographically independent molecules in the asymmetric unit). Selected distances [Å] and angles [°]: Cu1–C1 1.880(4), Cu1–C11 1.875(4), Cu1–N1 1.974(3), Cu1–N4 1.972(3), Cu1–N7 2.325(4), Cu2–C31 1.868(4), Cu2–C41 1.868(4), Cu2–N11 1.964(3), Cu2–N14 1.974(3), Cu2–N17 2.315(4); C1–Cu1–C11 173.36(17), C1–Cu1–N4 90.72(15), C1–Cu1–N1 88.93(15), C11–Cu1–N4 88.86(16), C11–Cu1–N1 90.69(16), N4–Cu1–N1 173.14(13), C1–Cu1–N7 89.64(15), C11–Cu1–N7 96.99(15), N1–Cu1–N7 96.19(13), N4–Cu1–N7 90.66(13), C21–N7–Cu1 160.7(4), C31–Cu2–C41 172.55(17), C31–Cu2–N14 88.79(16), C41–Cu2–N14 90.79(15), C31–Cu2–N11 91.55(15), C41–Cu2–N11 87.87(15), N11–Cu2–N14 172.25(13), C31–Cu2–N17 93.19(15), C41–Cu2–N17 94.26(15), N14–Cu2–N17 94.30(13), N11–Cu2–N17 93.41(13), C51–N17–Cu2 165.9(4).

## SUPPORTING INFORMATION

2. Equilibrium between **1** and **1'**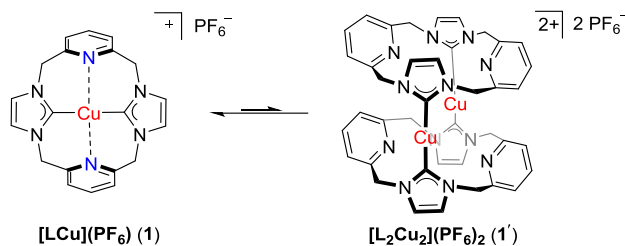

**Scheme 1.** The equilibrium between the monomer (**1**) and dimer (**1'**).

Solid samples of **1** and **1'** show different IR spectra (Figures S8 and S9). However, a yellow solution is obtained when **1'** is dissolved in MeCN, and the <sup>1</sup>H NMR, UV-vis, and MS(EI) spectra of **1'** in MeCN (at room temperature) are the same as those recorded for **1**. When **1'** was added to frozen [D<sub>3</sub>]MeCN and [D<sub>6</sub>]acetone in J. Young NMR tubes, respectively, and <sup>1</sup>H NMR spectrum were immediately recorded at -40 °C and -85 °C (respectively), the spectra are identical with those of **1** recorded at the same temperatures. It is noteworthy that the <sup>1</sup>H NMR spectra of **1** and **1'** in [D<sub>3</sub>]MeCN at -40 °C show a series of new peaks with low intensity (Figure S42). A <sup>1</sup>H-DOSY experiment shows that these new peaks belong to different species with diffusion constants smaller than the one of **1**, which is an indication of their higher molecular weight (Figure S43). Attempts to clearly assign these new peaks through 2D-NMR experiments were unsuccessful due to the weakness of these peaks. These data suggest that the monomeric form **1** is the most dominant form in solution, and that the equilibrium between the monomer (**1**) and the dimer (**1'**) and/or other oligomers is quite fast.

## SUPPORTING INFORMATION

## 3. UV-vis Spectra of 1-3

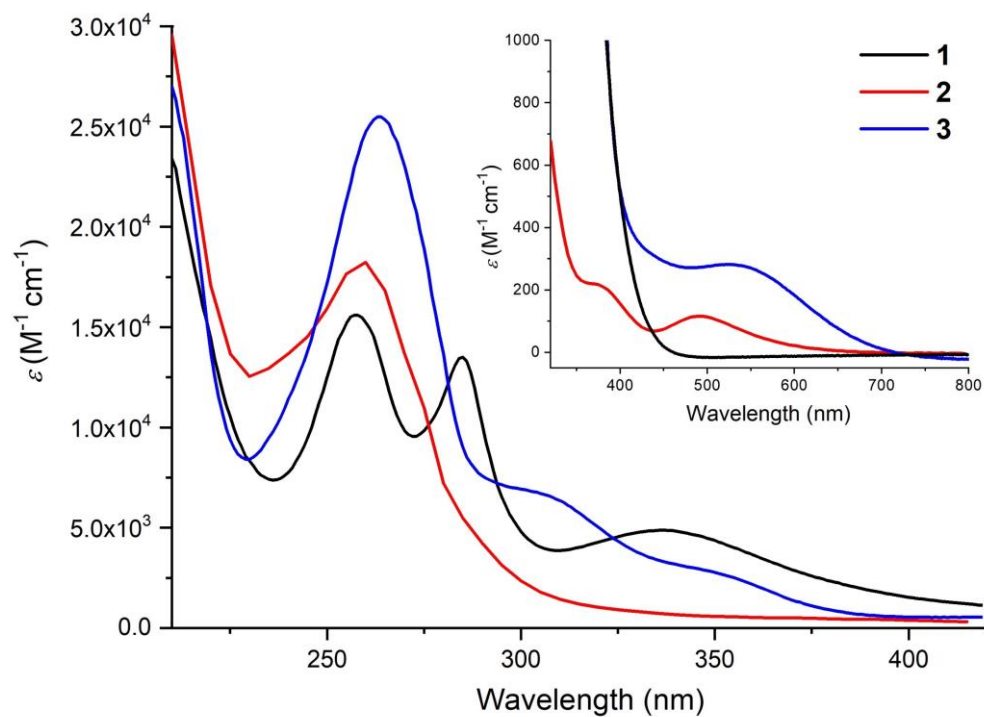

**Figure S5.** UV-vis spectra of 1–3 (in MeCN) recorded at room temperature.

**Table S3.** Absorption spectra data of 1–3 (in MeCN) recorded at room temperature.

| Complexes | $\lambda_{\max}$ , nm ( $\epsilon$ , $M^{-1} \text{ cm}^{-1}$ ) |
|-----------|-----------------------------------------------------------------|
| 1         | 260 (15670), 280 (13580), 340 (4960)                            |
| 2         | 260 (18230), 370 (220), 490 (120)                               |
| 3         | 260 (25460), 300 (6900), 350 (2900), 530 (290)                  |

## SUPPORTING INFORMATION

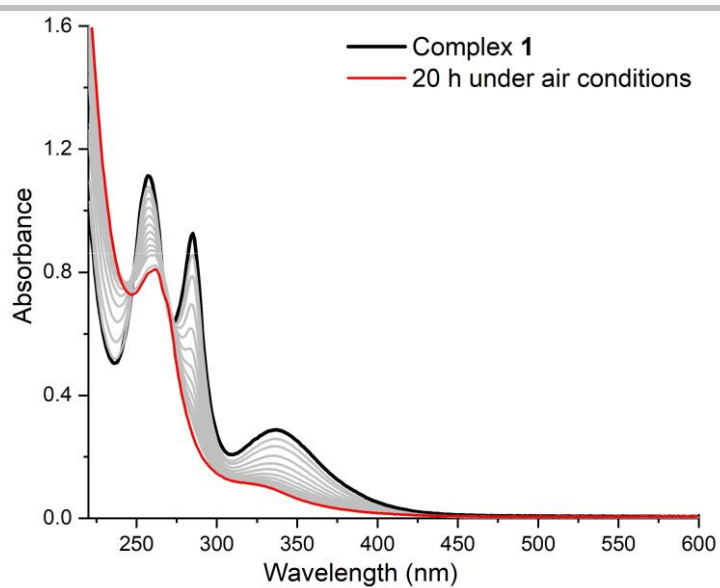

**Figure S6.** UV-vis spectra of **1** (in MeCN) under air conditions recorded at room temperature (the decomposition of **1** through grey lines is visible).

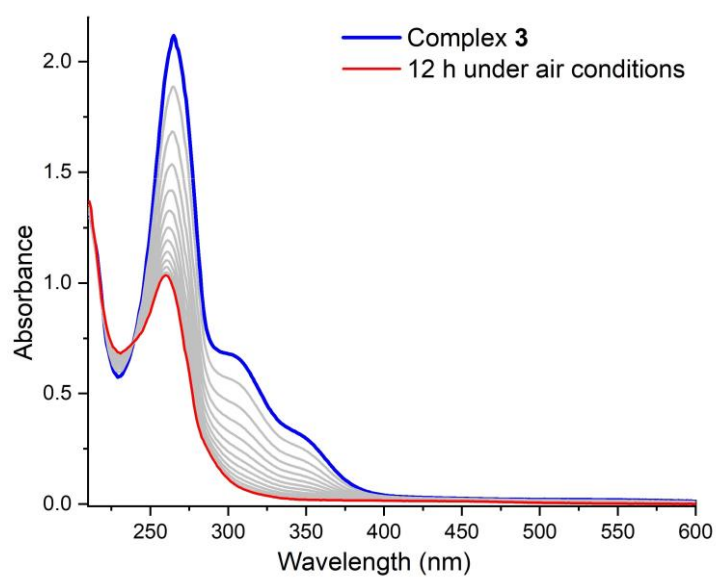

**Figure S7.** UV-vis spectra of **3** (in MeCN) under air conditions recorded at room temperature (the decomposition of **3** through grey lines is visible).

## SUPPORTING INFORMATION

## 4. IR Spectra of 1-3

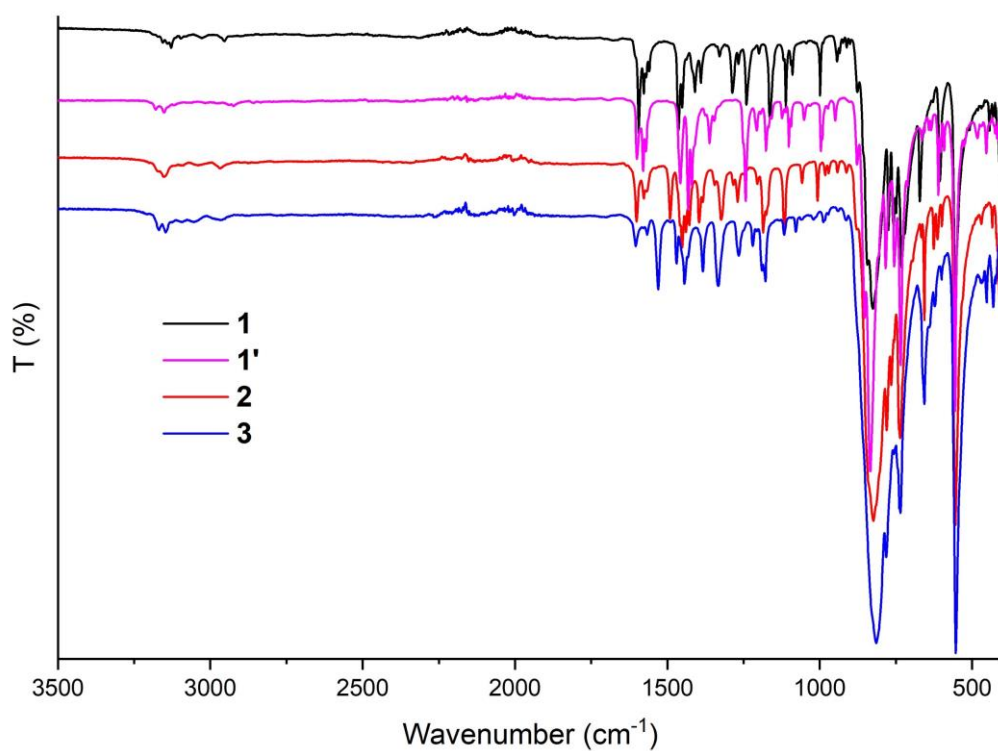

Figure S8. Comparative ATR-IR spectra of 1, 1', 2 and 3 (solid, wavenumber range from 3500 to 400  $\text{cm}^{-1}$ ).

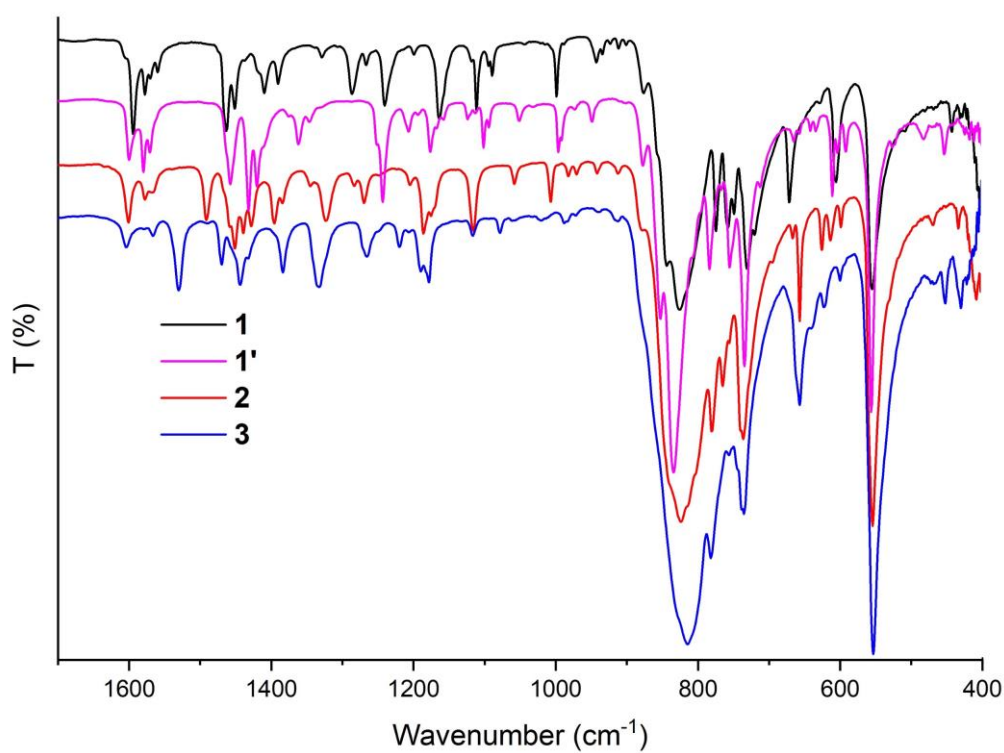

Figure S9. Comparative ATR-IR spectra of 1, 1', 2 and 3 (solid, wavenumber range from 1700 to 400  $\text{cm}^{-1}$ ).

## SUPPORTING INFORMATION

## 5. ESI Mass Spectra of 1 and 2

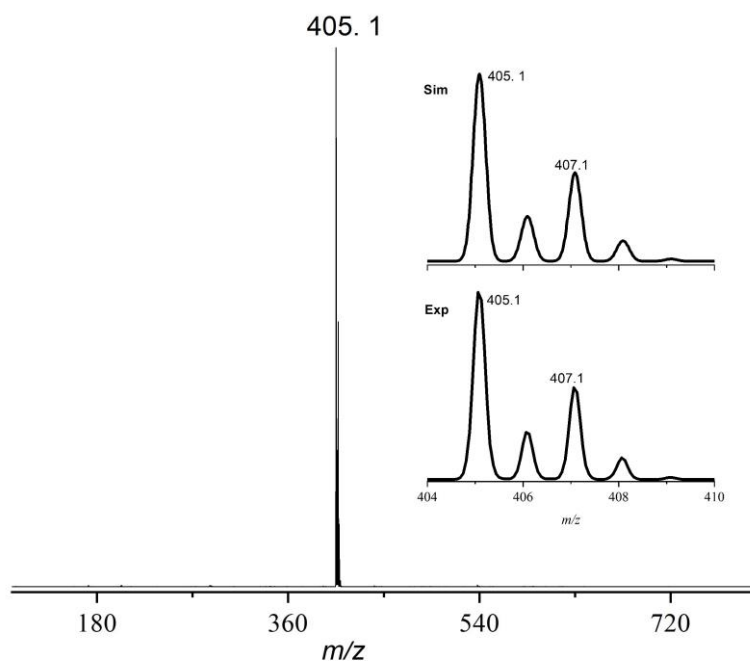

**Figure S10.** ESI-MS of complex 1 in MeCN. The inset shows the experimental (bottom) and simulated (top) isotope pattern for the peak around  $m/z = 405$  (100)  $[M-PF_6]^+$ .

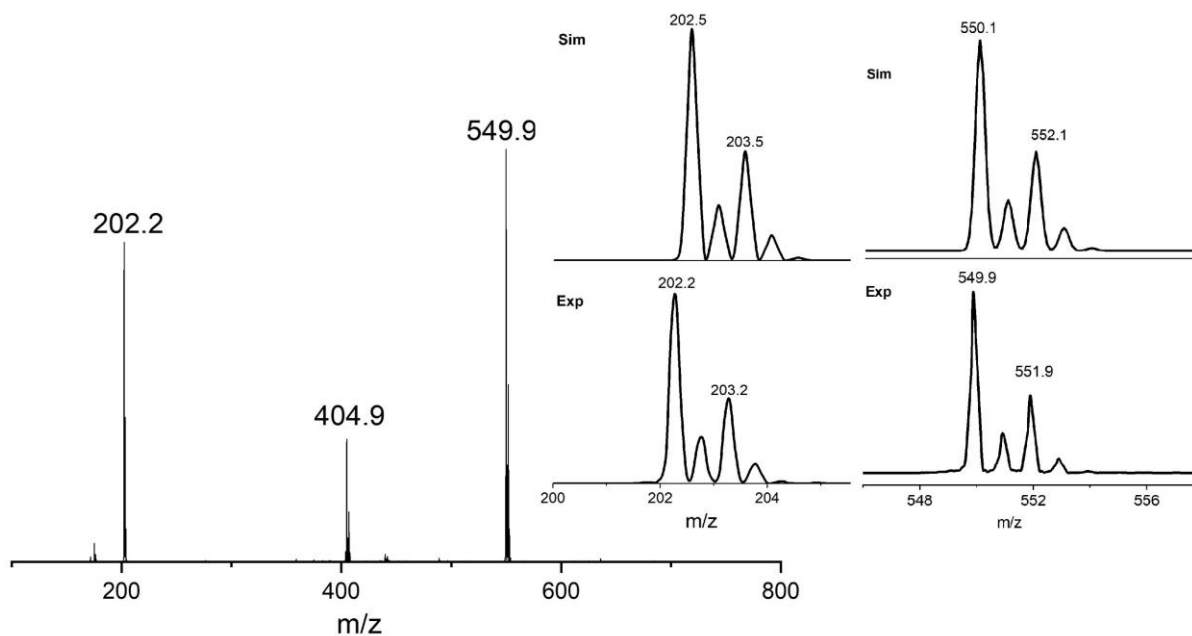

**Figure S11.** ESI-MS of complex 2 in MeCN. The inset shows the experimental (bottom) and simulated (top) isotope pattern for the peak around  $m/z = 202$  (78),  $[M-2PF_6]^{2+}$  and  $m/z = 550$  (100),  $[M-PF_6]^+$ . The peak around  $m/z = 405$  (30) can be attributed to the cation of 1, which likely originates from the reduction of 2 during the ionization process.

## SUPPORTING INFORMATION

## 6. Cyclic Voltammetry of 1

Cyclic voltammetry experiments were performed using ferrocene as the internal standard. Under the experimental conditions the  $\text{Fc}/\text{Fc}^+$  couple is a reversible redox couple showing a peak separation of  $\Delta E^p = 76$  mV (100 mV/s) with a slight dependence on the scan rate. Due to the electrode-absorption of the copper species, the working electrode was polished after each scan cycle, however, the broadening of return peaks still can be observed.

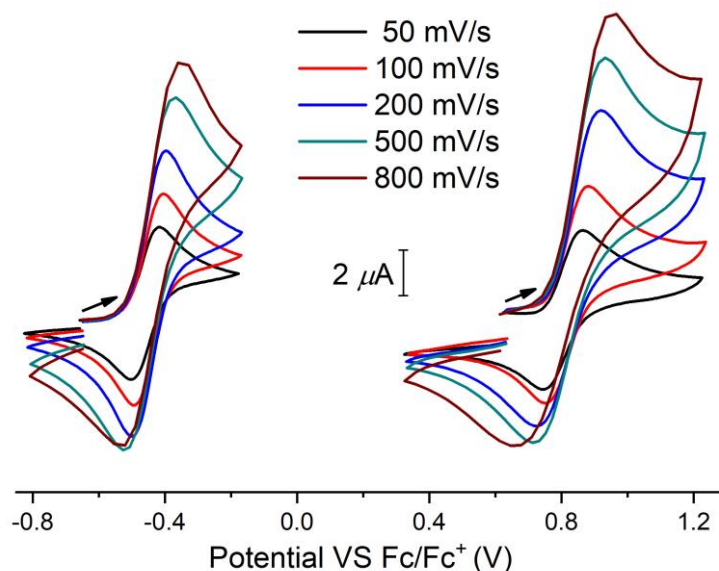

**Figure S12.** Cyclic voltammograms of 1 in MeCN (0.1 M  $\text{Bu}_4\text{NPF}_6$ ) at different scan rates. Left:  $\text{Cu}^{\text{I}}/\text{Cu}^{\text{II}}$  redox couple; Right:  $\text{Cu}^{\text{II}}/\text{Cu}^{\text{III}}$  redox couple.

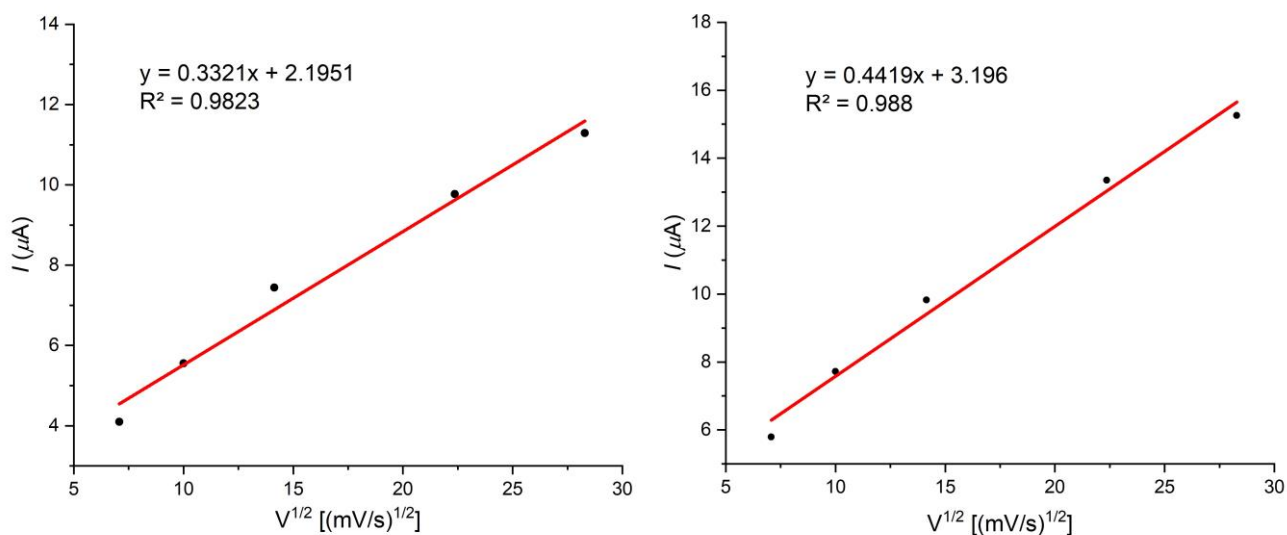

**Figure S13.** Linear dependence of the current  $I_p$  of the forward peak on the square root of the scan rate. Left:  $\text{Cu}^{\text{I}}/\text{Cu}^{\text{II}}$  redox couple; Right:  $\text{Cu}^{\text{II}}/\text{Cu}^{\text{III}}$  redox couple.



## SUPPORTING INFORMATION

## 7. EPR spectrum of 2 at 147 K

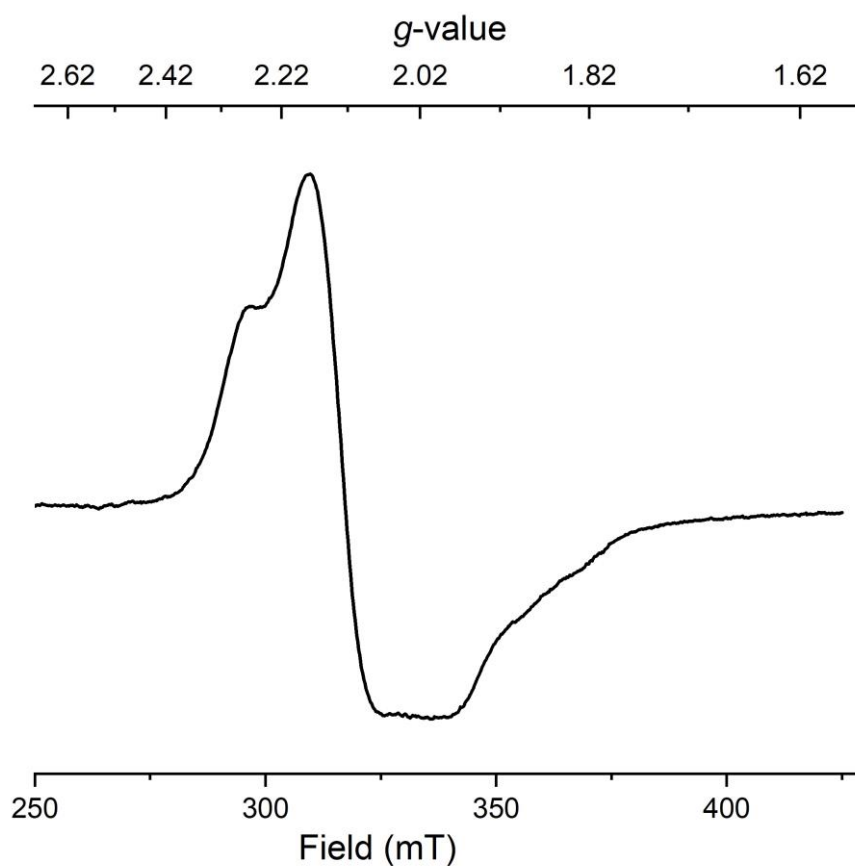

**Figure S14.** EPR spectrum of 2 recorded in frozen MeCN solution at 147 K. Instrumental parameters:  $\nu = 9.427$  GHz, modulation frequency = 100 kHz, modulation amplitude = 4.0 G, microwave power = 7.95 mW, conversion time = 5.12 ms, time constant = 40.96 ms, sweep time = 5.24 s. The spectrum exhibits a rhombic signal with approximate  $g$ -values [2.25, 2.12, 2.00], however, it could not be satisfactorily simulated due to the rather large linewidths.

## SUPPORTING INFORMATION

## 8. SQUID Magnetometry of 2

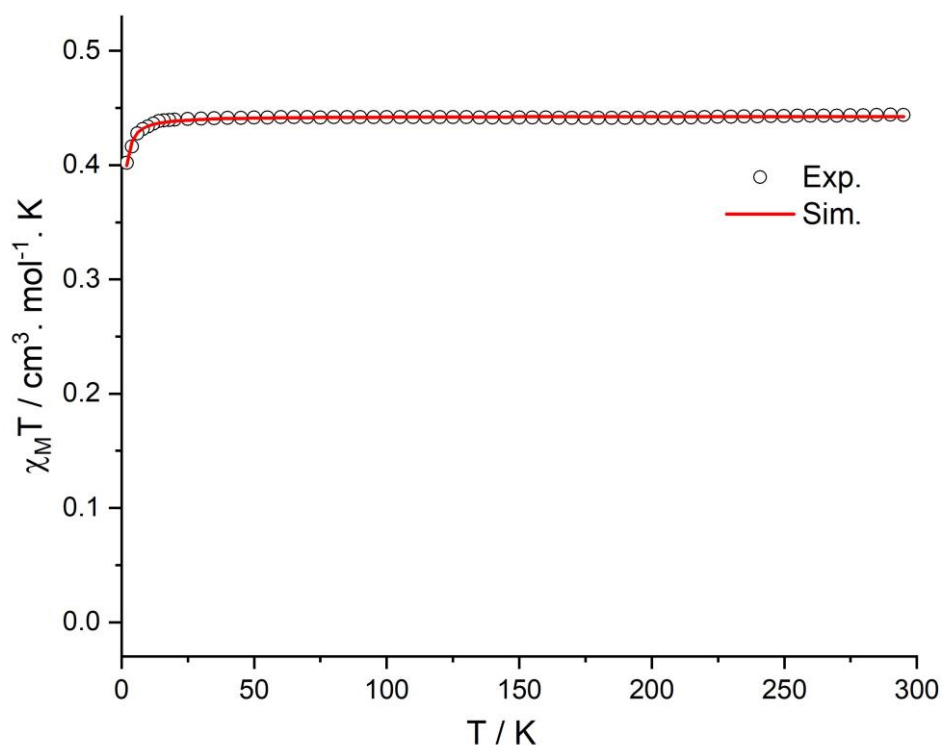

**Figure S15.**  $\chi_M T$  vs.  $T$  measurement for a solid sample of **2** in the temperature range of 295 – 2 K at 0.5 T. Best fit parameters for the simulation with  $S = \frac{1}{2}$  are  $g = 2.17$  and  $TIP = 25 \cdot 10^{-6} \text{ cm}^3 \cdot \text{mol}^{-1}$ . Weak intermolecular interactions were considered in a mean field approach by using a Weiss temperature  $\theta = -0.2$  K.

## SUPPORTING INFORMATION

## 9. NMR Spectra

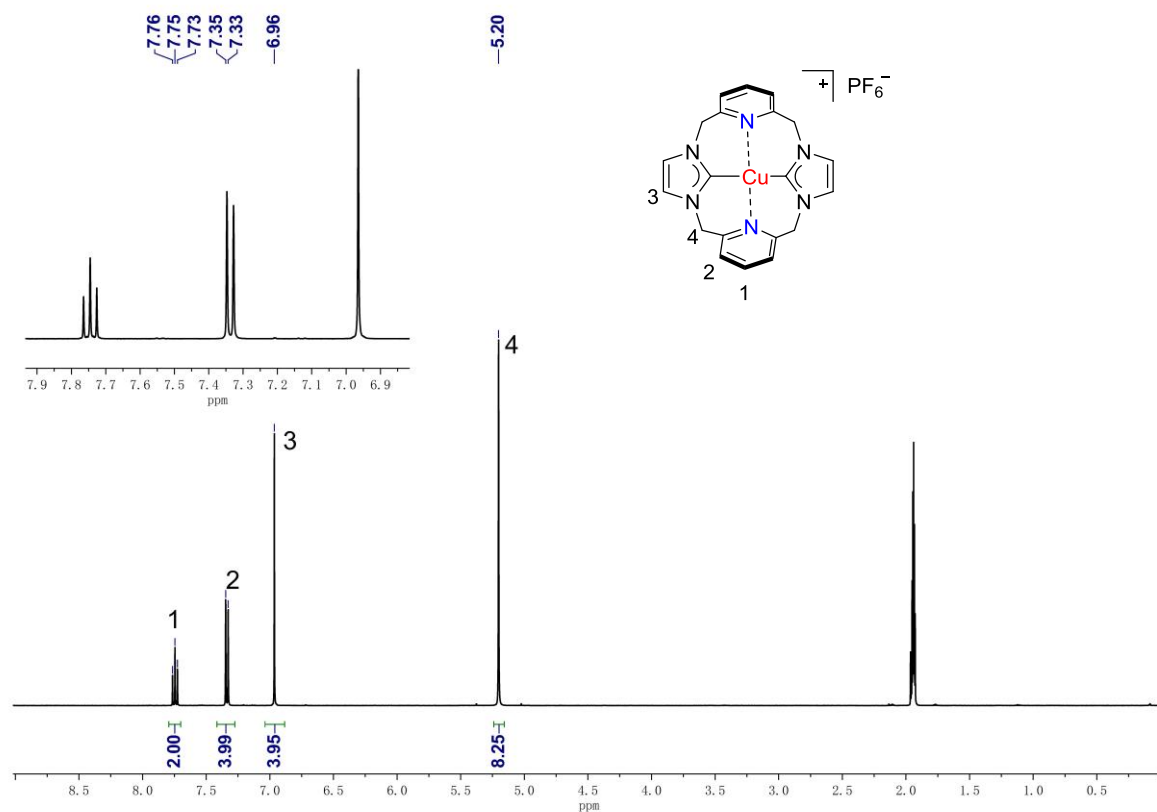

Figure S16.  $^1\text{H}$  NMR spectrum of  $[\text{LCu}](\text{PF}_6)$  (1) in  $[\text{D}_3]\text{MeCN}$  (400 MHz, 298 K).

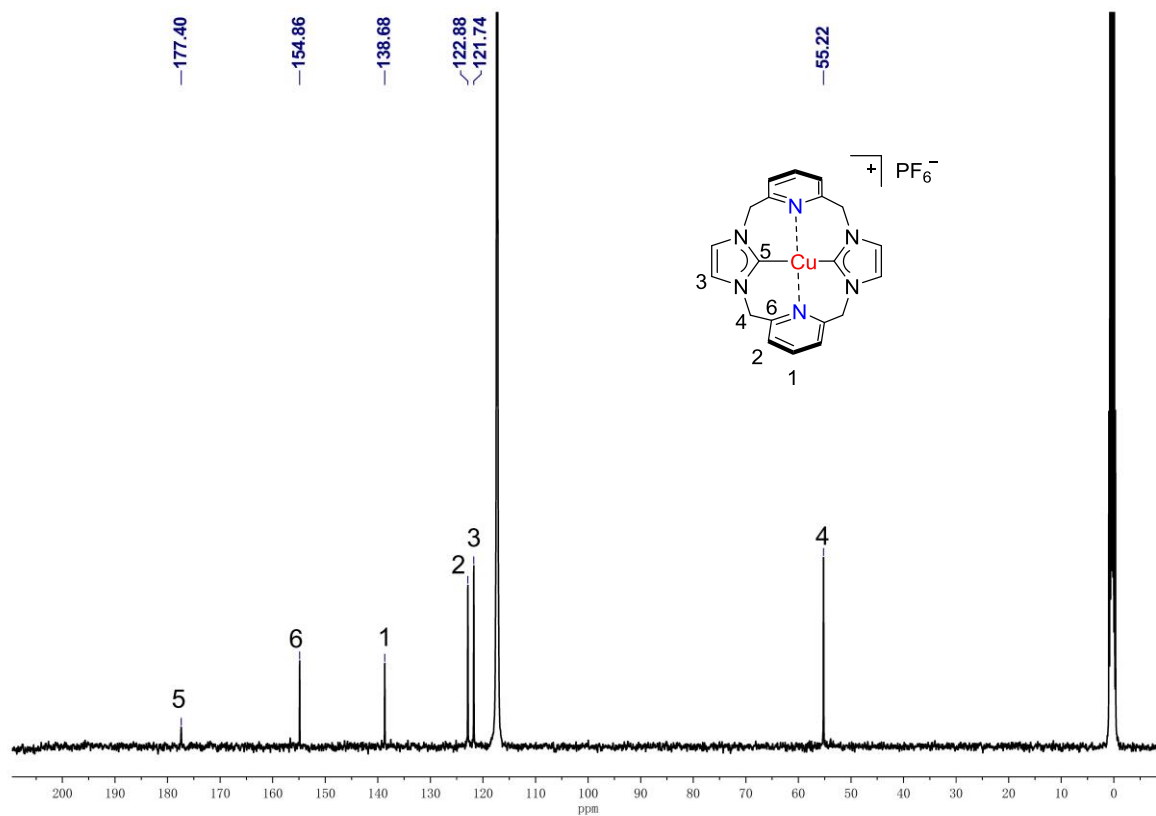

Figure S17.  $^{13}\text{C}$  NMR spectrum of  $[\text{LCu}](\text{PF}_6)$  (1) in  $[\text{D}_3]\text{MeCN}$  (100 MHz, 298 K).

## SUPPORTING INFORMATION

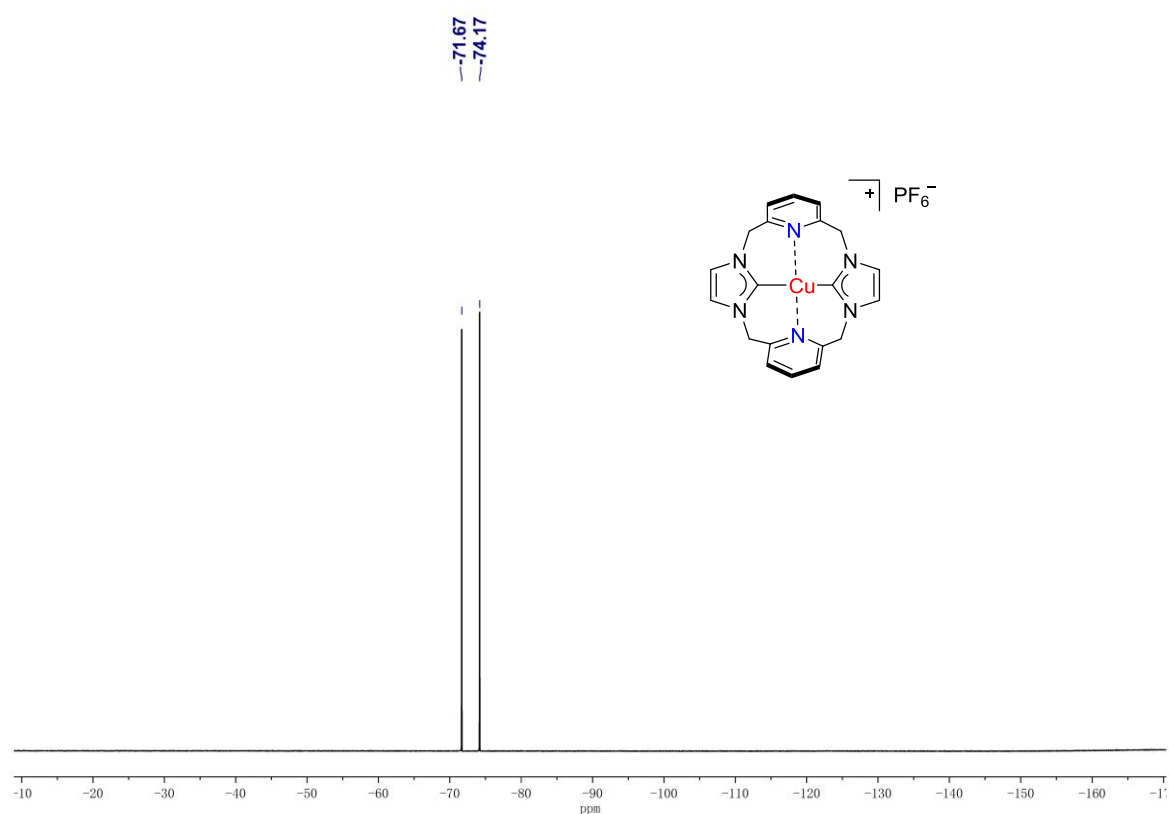

Figure S18.  $^{19}F$  NMR spectrum of  $[LCu](PF_6)$  (1) in  $[D_3]MeCN$  (283 MHz, 298 K).

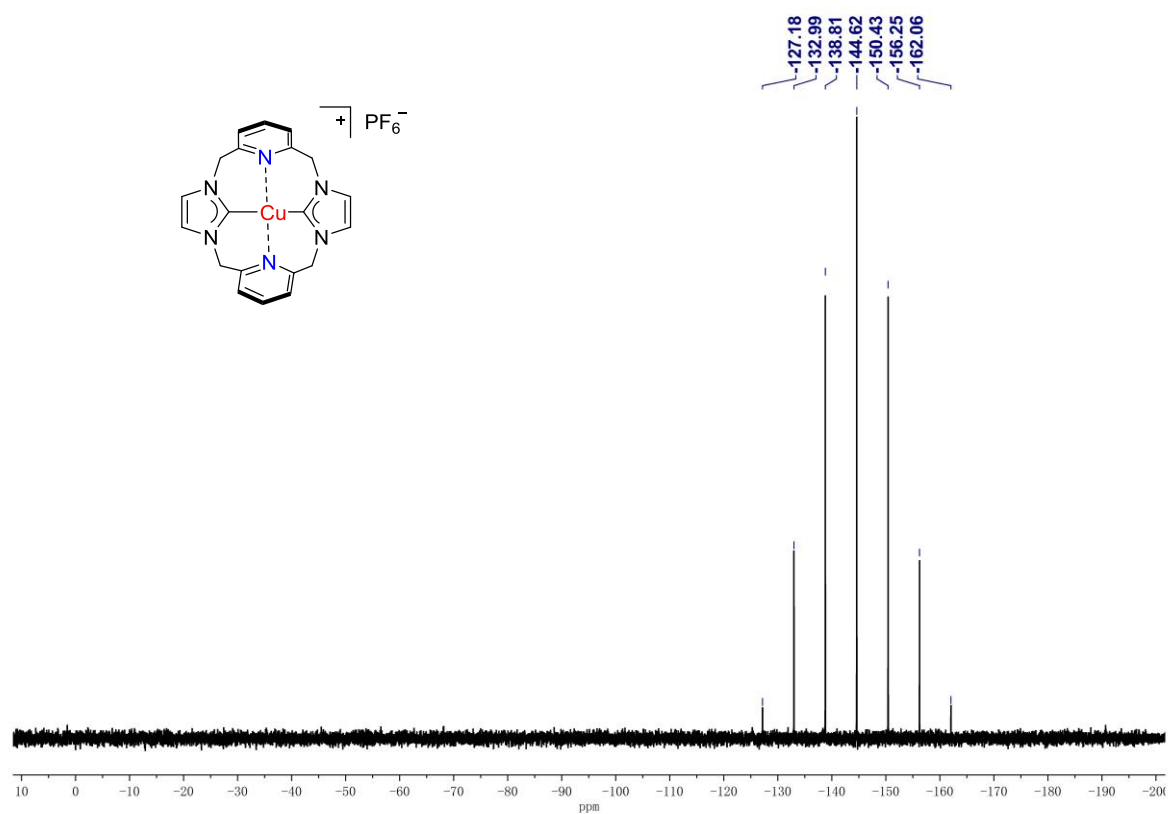

Figure S19.  $^{31}P$  NMR spectrum of  $[LCu](PF_6)$  (1) in  $[D_3]MeCN$  (122 MHz, 298 K).

## SUPPORTING INFORMATION

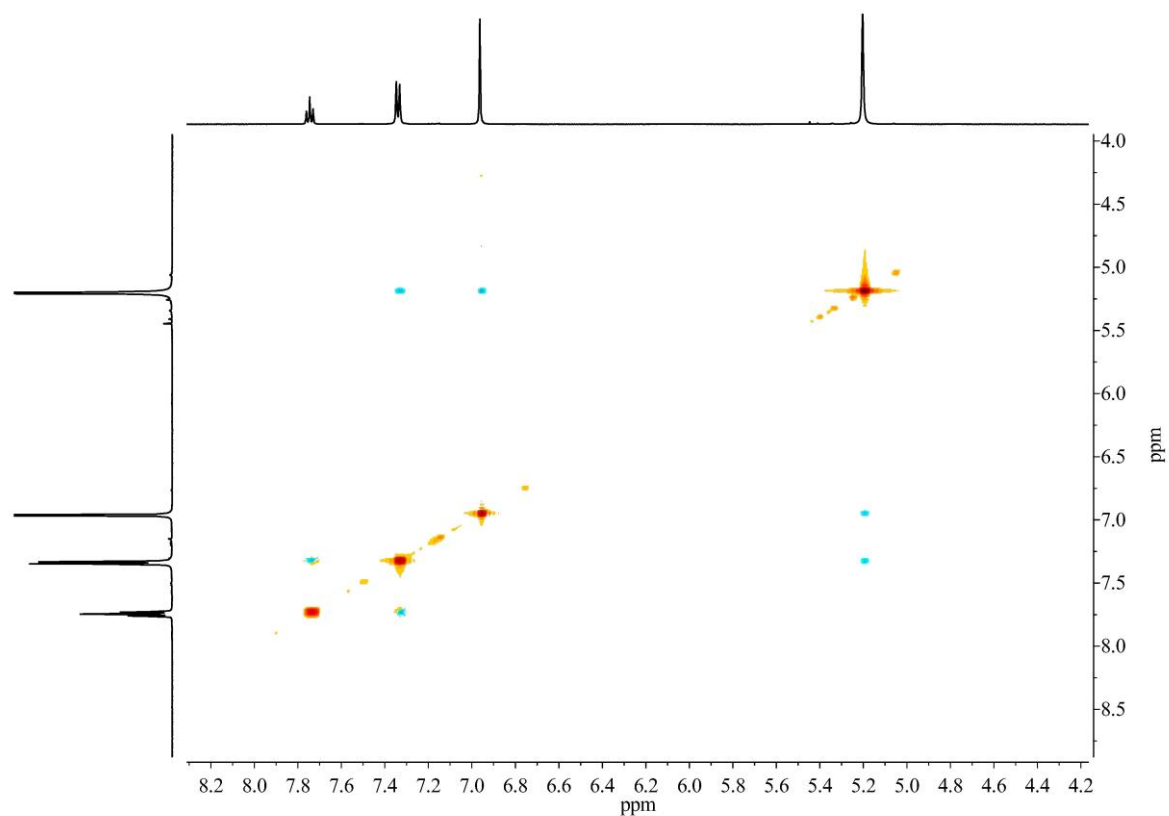

Figure S20.  $^1\text{H}$ - $^1\text{H}$  NOESY spectrum of [LCu](PF<sub>6</sub>) (1) in [D<sub>3</sub>]MeCN (500, 500 MHz, 298 K).

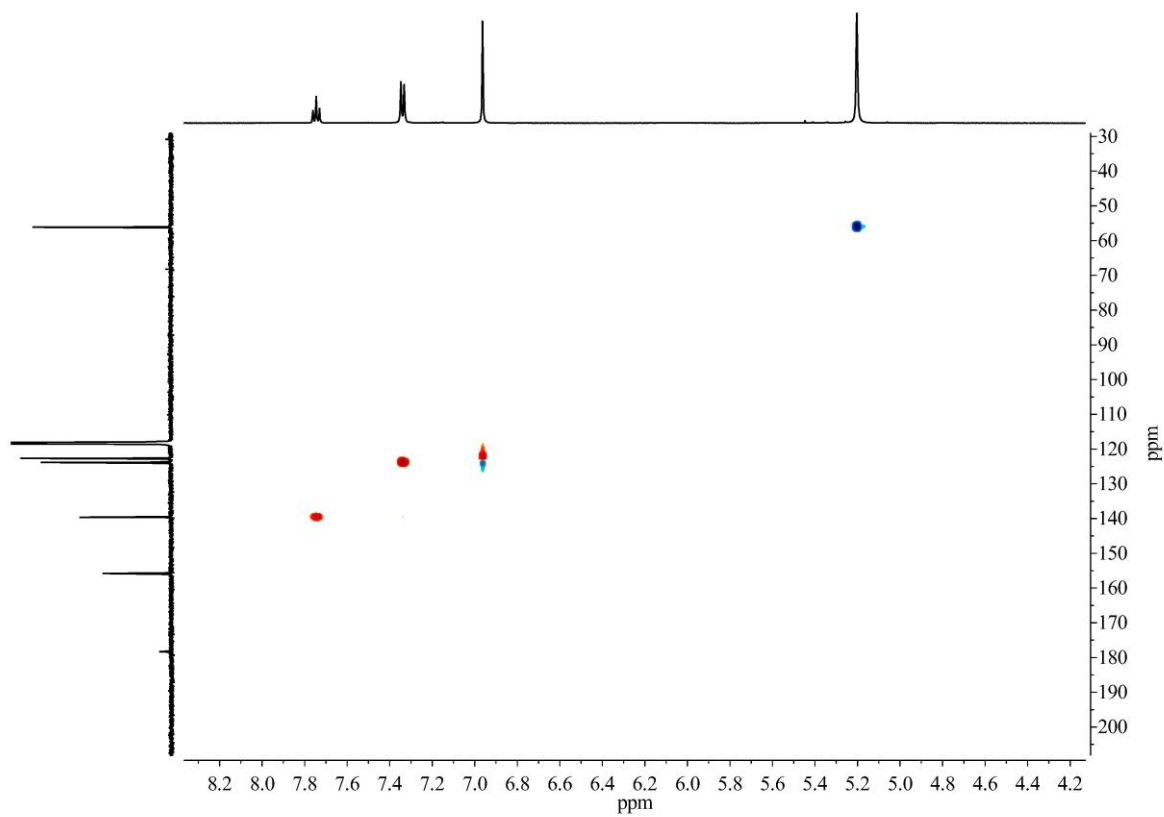

Figure S21.  $^1\text{H}$ - $^{13}\text{C}$  HSQC spectrum of [LCu](PF<sub>6</sub>) (1) in [D<sub>3</sub>]MeCN (500, 125 MHz, 298 K).

## SUPPORTING INFORMATION

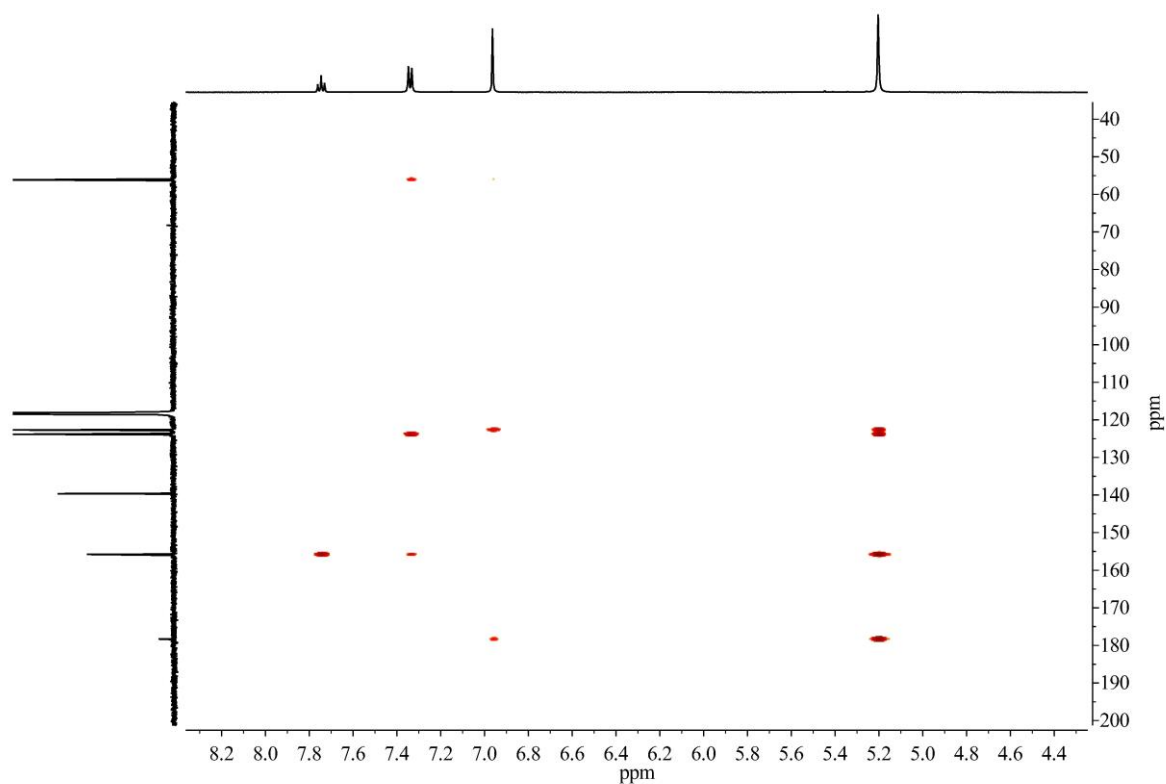

Figure S22.  $^1\text{H}$ - $^{13}\text{C}$  HMBC spectrum of  $[\text{LCu}](\text{PF}_6)$  (**1**) in  $[\text{D}_3]\text{MeCN}$  (500, 125 MHz, 298 K).

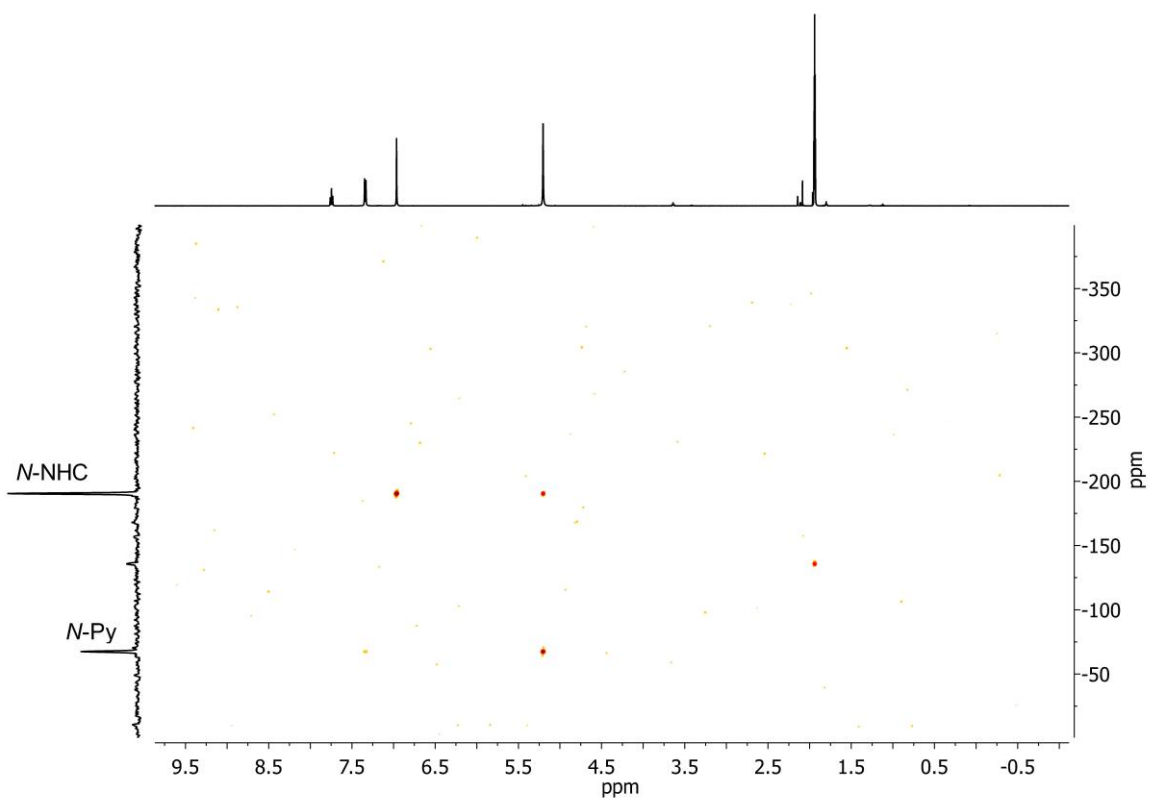

Figure S23.  $^1\text{H}$ - $^{15}\text{N}$  HMBC spectrum of  $[\text{LCu}](\text{PF}_6)$  (**1**) in  $[\text{D}_3]\text{MeCN}$  (500, 50 MHz, 298 K).

## SUPPORTING INFORMATION

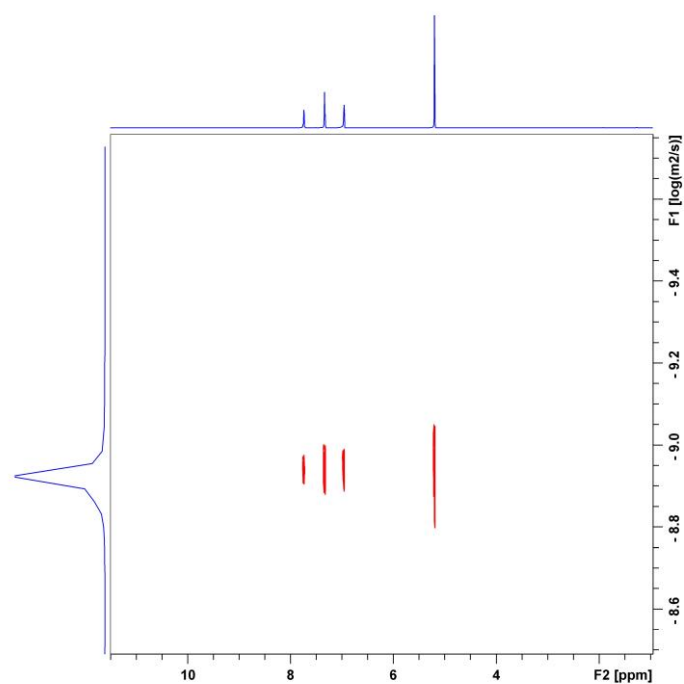

Figure S24. DOSY spectrum of [LCu](PF<sub>6</sub>) (1) in [D<sub>3</sub>]MeCN (500 MHz, 298 K) with the diffusion constant on the vertical axis.

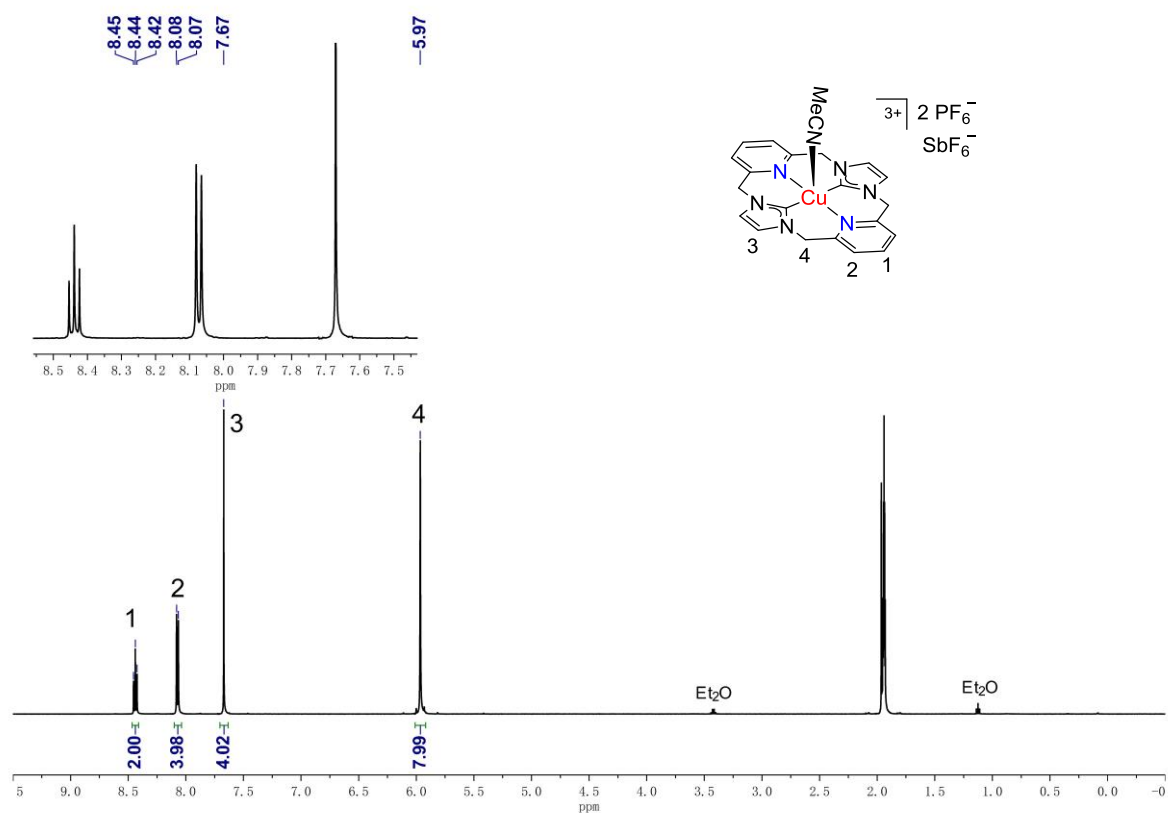

Figure S25. <sup>1</sup>H NMR spectrum of [LCu](PF<sub>6</sub>)<sub>2</sub>(SbF<sub>6</sub>) (3) in [D<sub>3</sub>]MeCN (500 MHz, 298 K).

## SUPPORTING INFORMATION

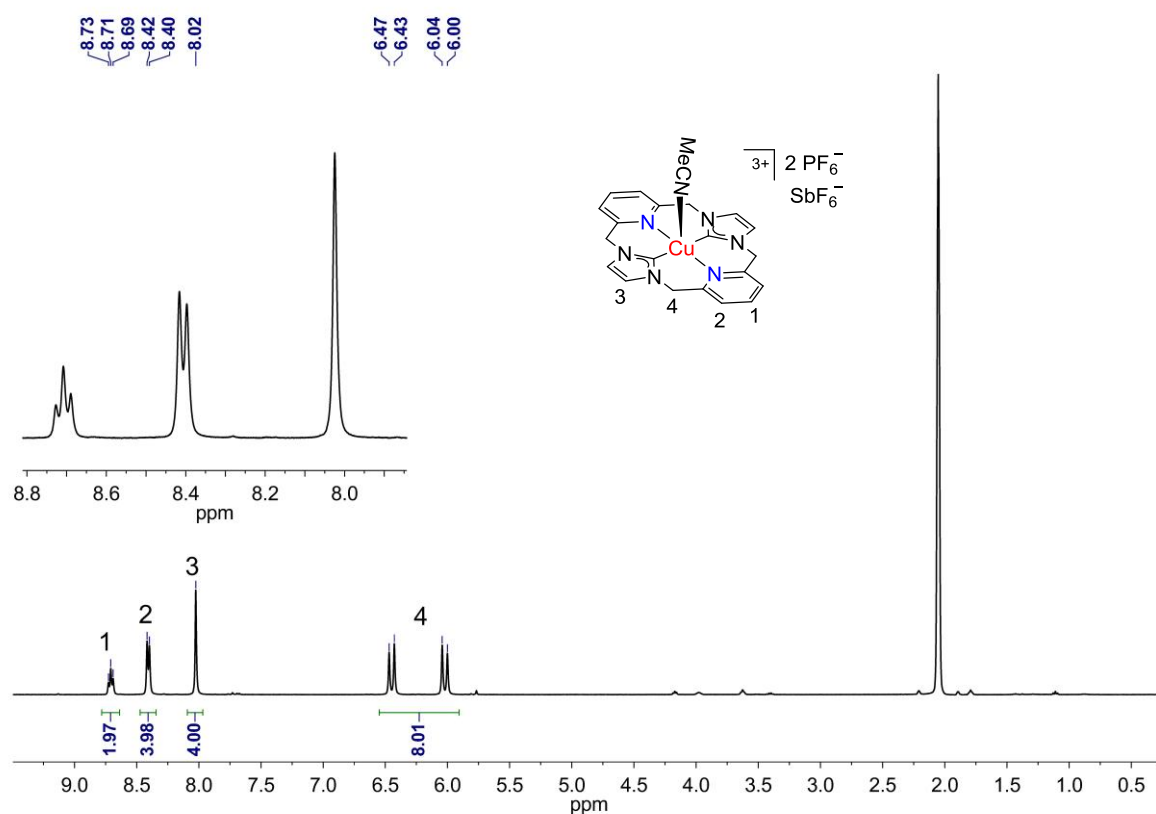

Figure S26.  $^1\text{H}$  NMR spectrum of  $[\text{LCu}](\text{PF}_6)_2(\text{SbF}_6)$  (**3**) in  $[\text{D}_6]\text{acetone}$  (400 MHz, 298 K).

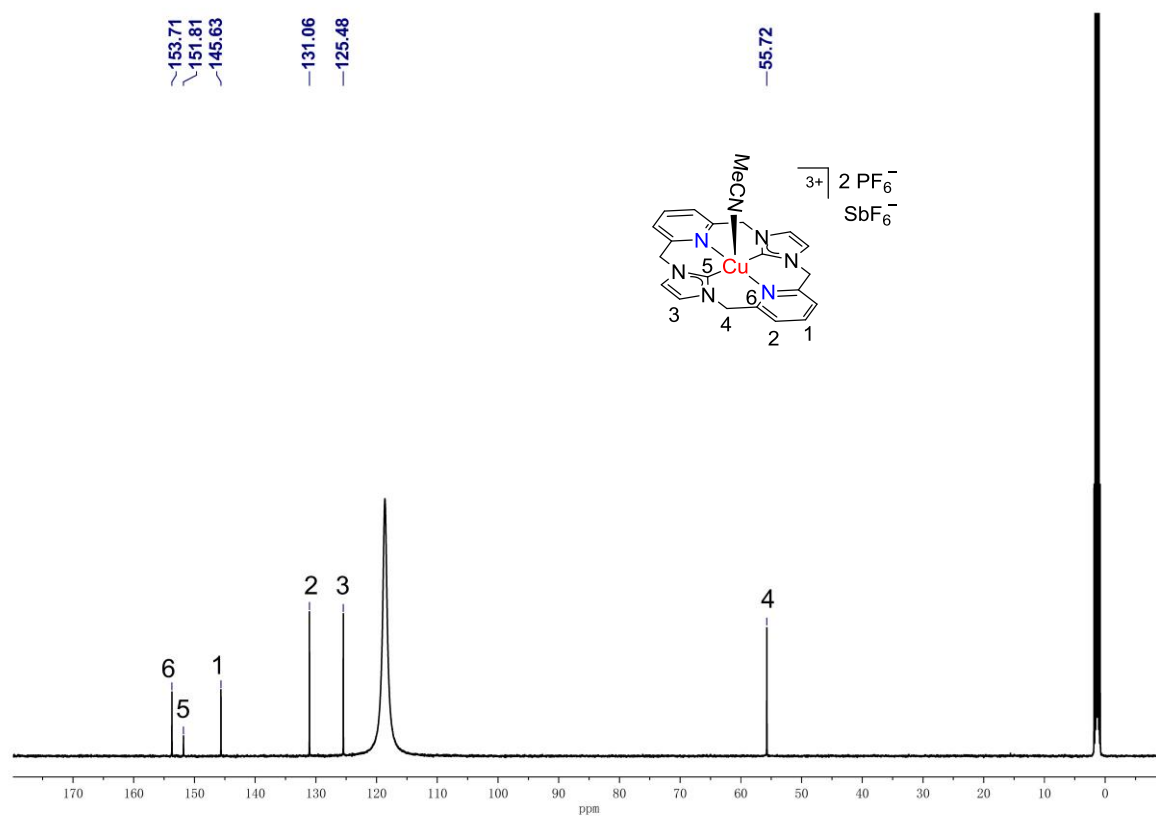

Figure S27.  $^{13}\text{C}$  NMR spectrum of  $[\text{LCu}](\text{PF}_6)_2(\text{SbF}_6)$  (**3**) in  $[\text{D}_3]\text{MeCN}$  (125 MHz, 298 K).



## SUPPORTING INFORMATION

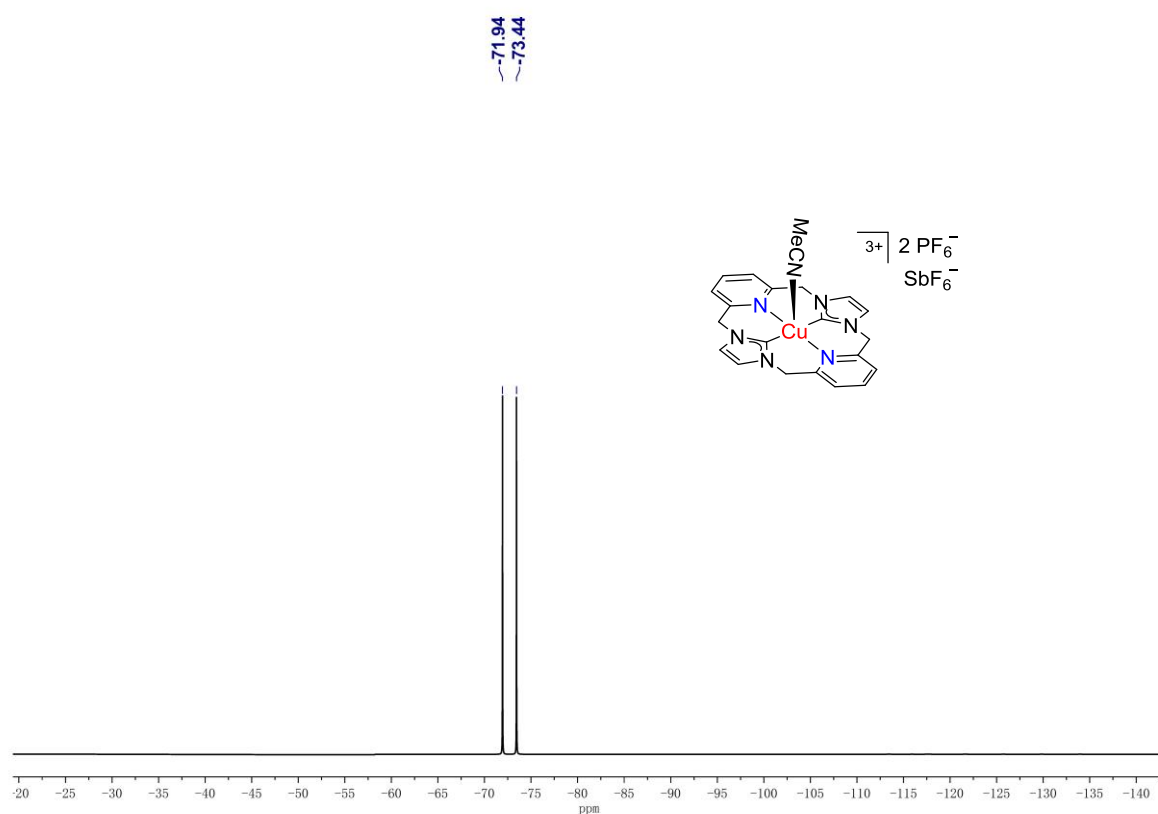

Figure S28.  $^{19}\text{F}$  NMR spectrum of  $[\text{LCu}](\text{PF}_6)_2(\text{SbF}_6)$  (**3**) in  $[\text{D}_3]\text{MeCN}$  (471 MHz, 298 K).

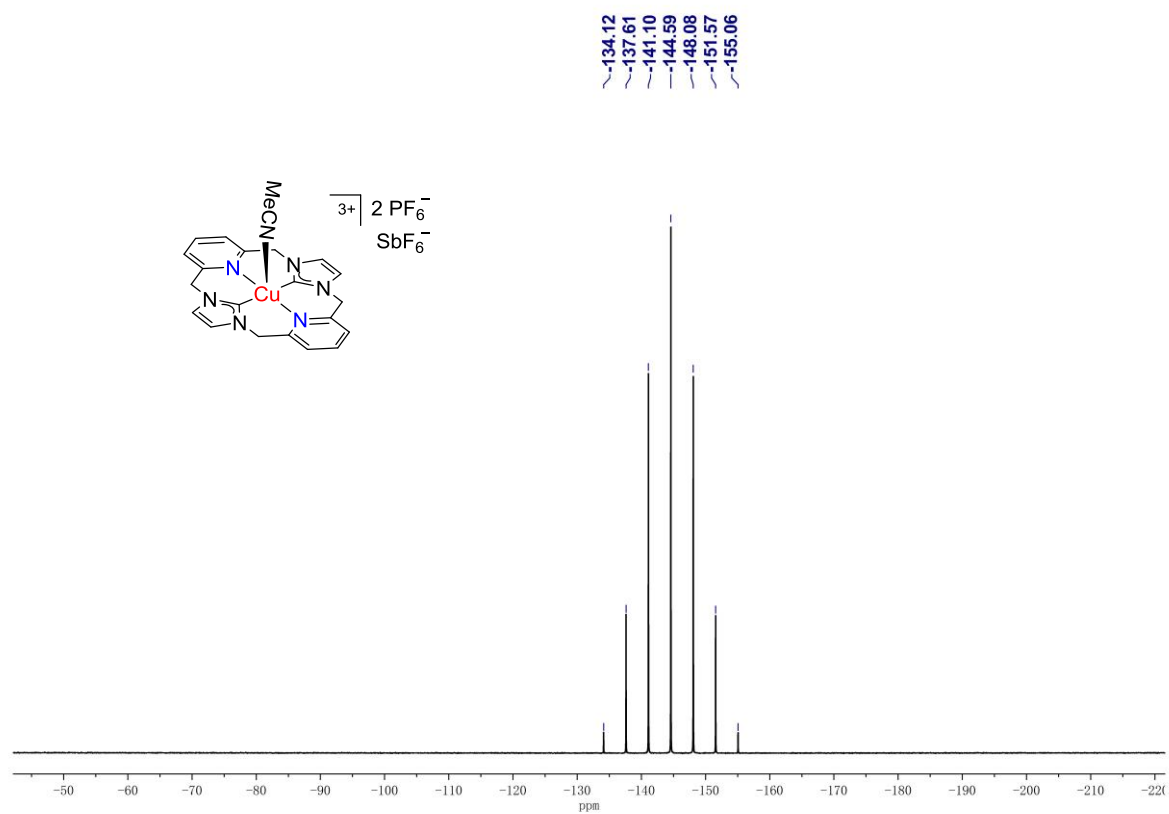

Figure S29.  $^{31}\text{P}$  NMR spectrum of  $[\text{LCu}](\text{PF}_6)_2(\text{SbF}_6)$  (**3**) in  $[\text{D}_3]\text{MeCN}$  (203 MHz, 298 K).

## SUPPORTING INFORMATION

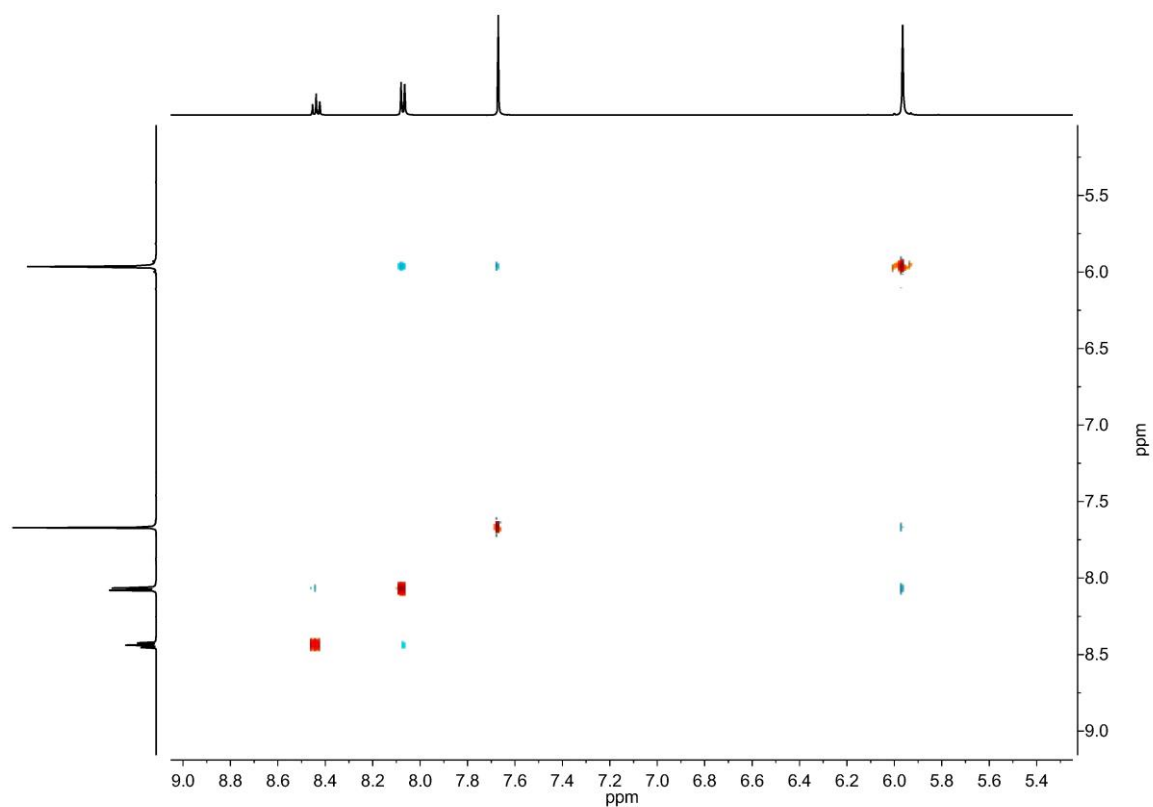

Figure S30.  $^1\text{H}$ - $^1\text{H}$  NOESY spectrum of  $[\text{LCu}](\text{PF}_6)_2(\text{SbF}_6)$  (**3**) in  $[\text{D}_3]\text{MeCN}$  (500, 500 MHz, 298 K).

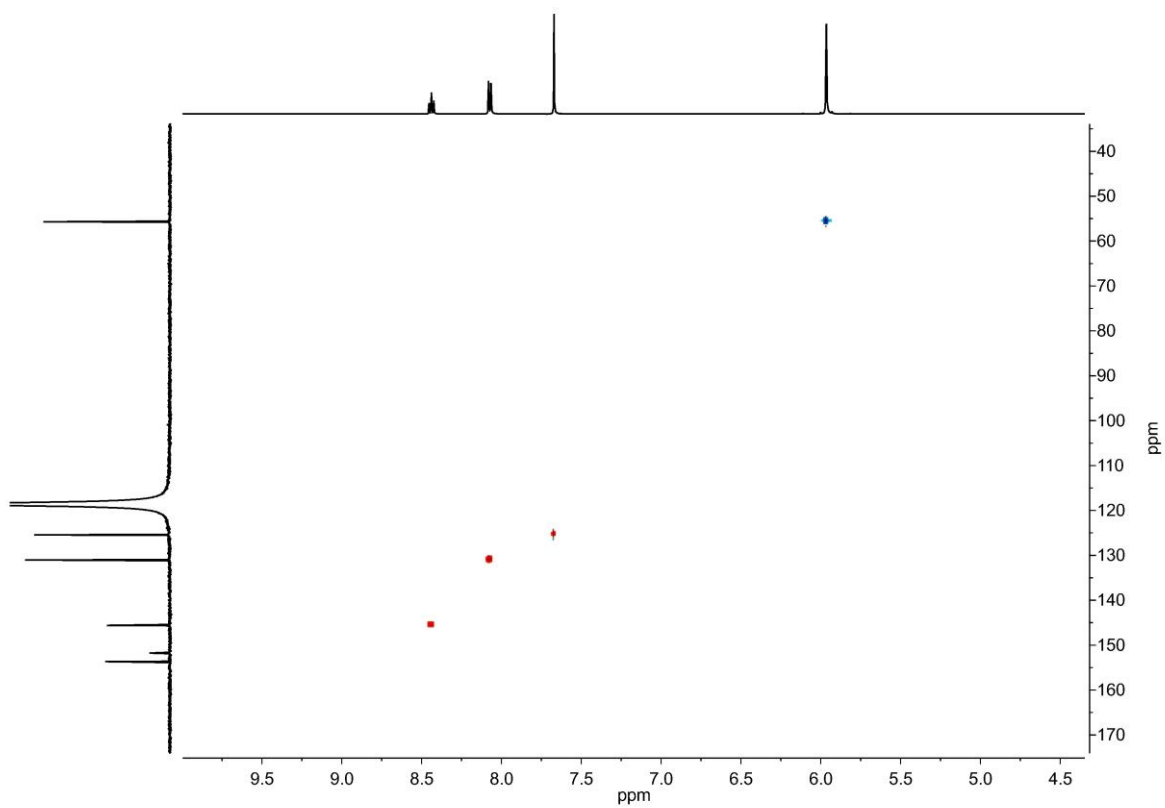

Figure S31.  $^1\text{H}$ - $^{13}\text{C}$  HSQC spectrum of  $[\text{LCu}](\text{PF}_6)_2(\text{SbF}_6)$  (**3**) in  $[\text{D}_3]\text{MeCN}$  (500, 125 MHz, 298 K).

## SUPPORTING INFORMATION

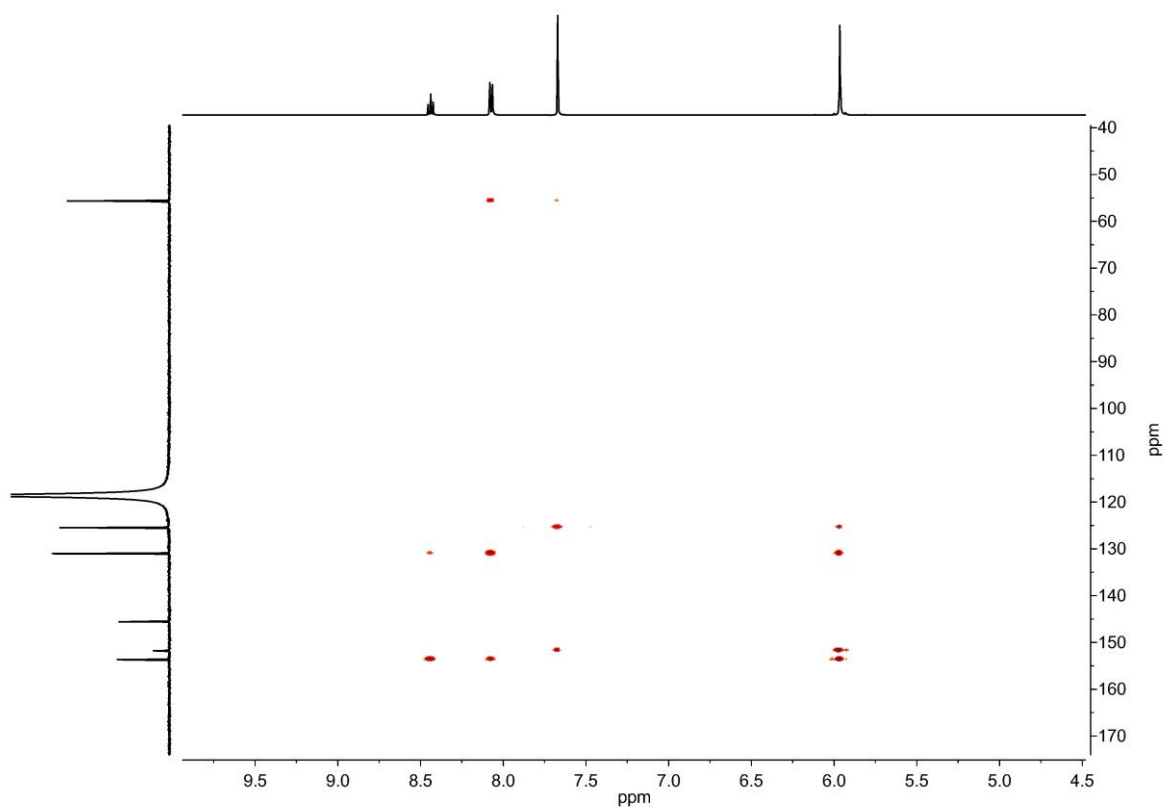

Figure S32.  $^1\text{H}$ - $^{13}\text{C}$  HMBC spectrum of  $[\text{LCu}](\text{PF}_6)_2(\text{SbF}_6)$  (**3**) in  $[\text{D}_3]\text{MeCN}$  (500, 125 MHz, 298 K).

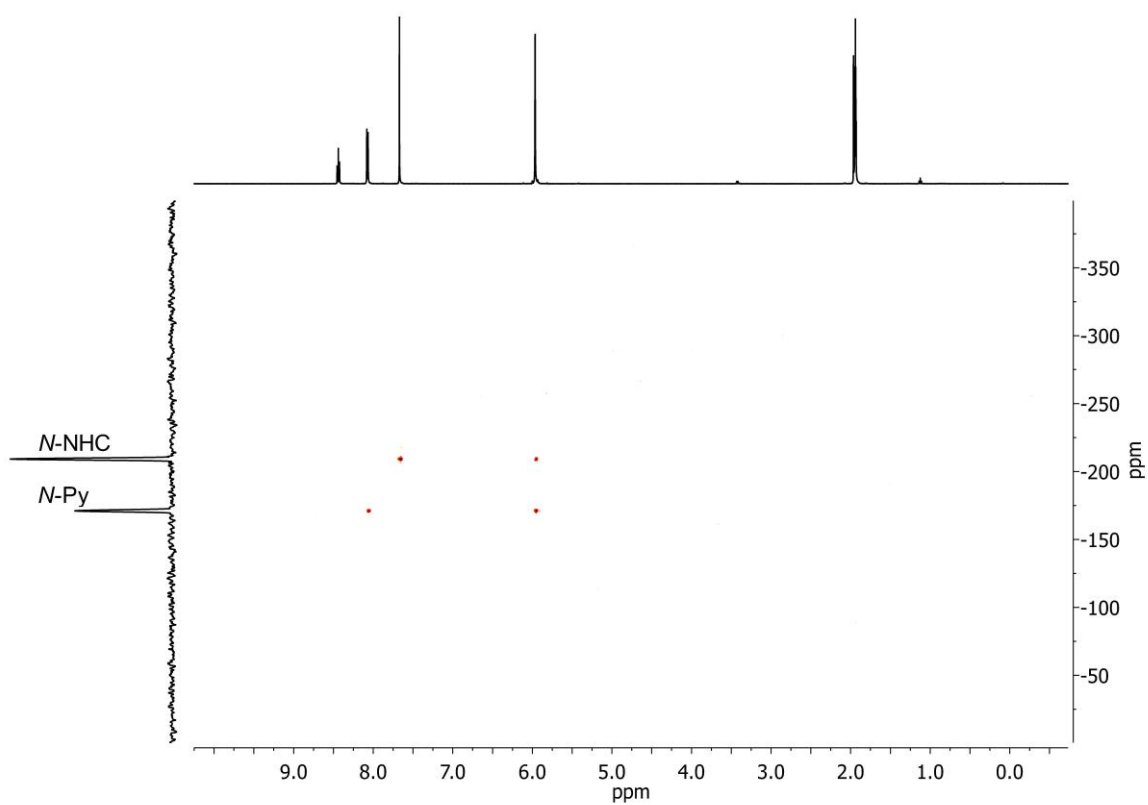

Figure S33.  $^1\text{H}$ - $^{15}\text{N}$  HMBC spectrum of  $[\text{LCu}](\text{PF}_6)_2(\text{SbF}_6)$  (**3**) in  $[\text{D}_3]\text{MeCN}$  (500, 50 MHz, 298 K).

## SUPPORTING INFORMATION

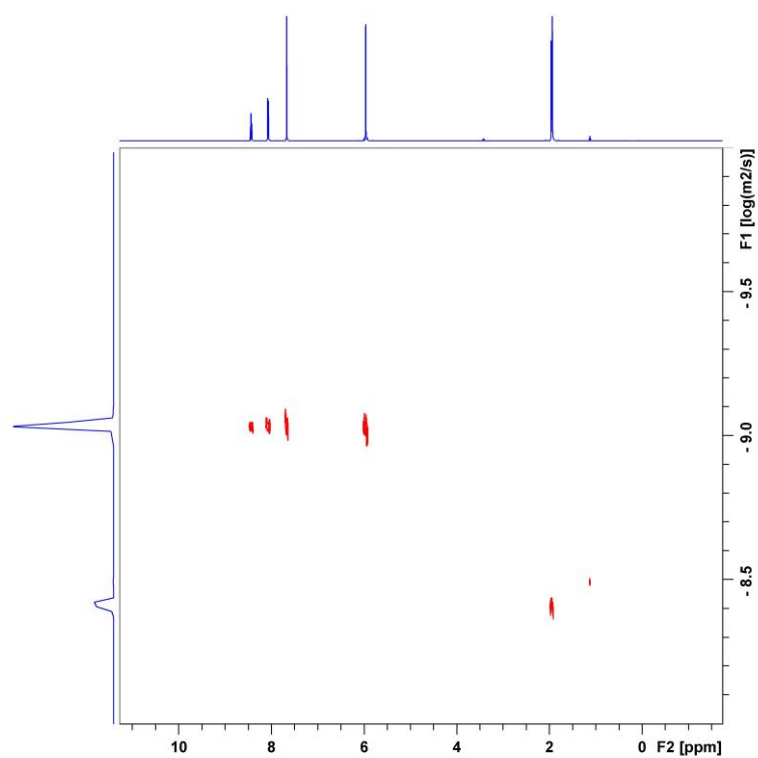

Figure S34. DOSY spectrum of [LCu](PF<sub>6</sub>)<sub>2</sub>(SbF<sub>6</sub>) (3) in [D<sub>3</sub>]MeCN (500 MHz, 298 K) with the diffusion constant on the vertical axis.

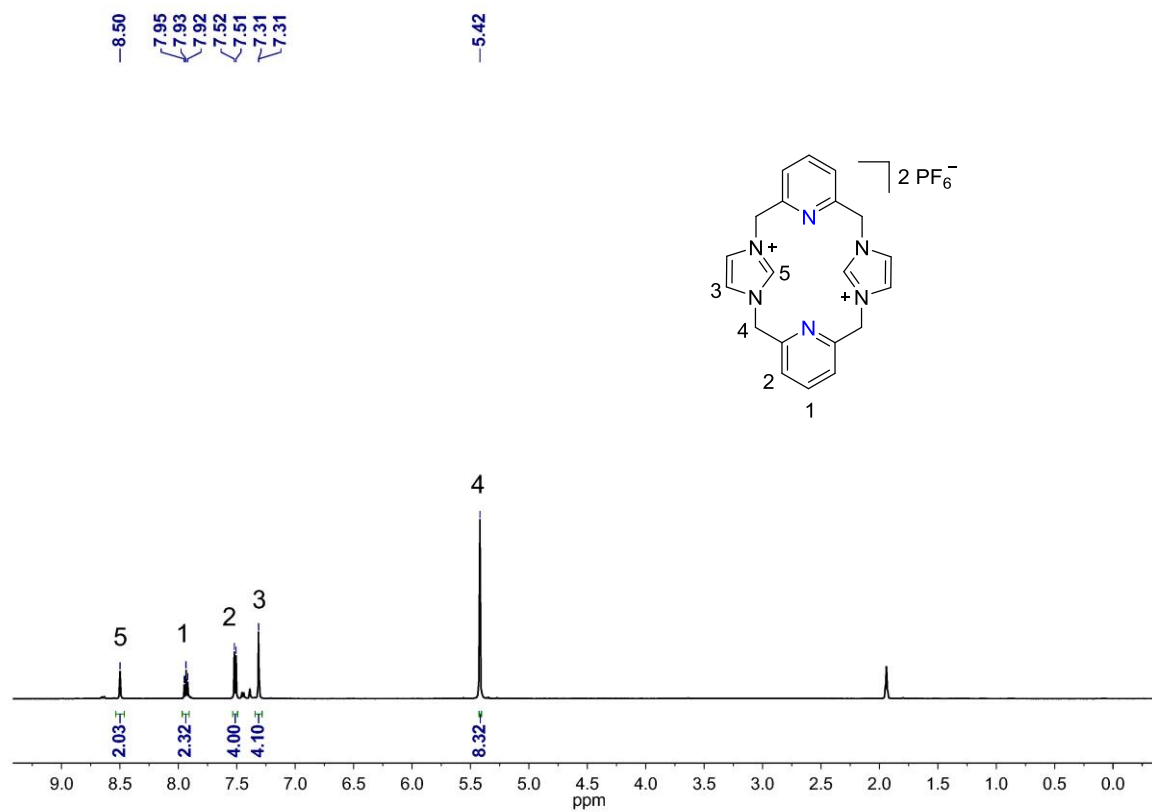

Figure S35. <sup>1</sup>H NMR spectrum of [H<sub>2</sub>L](PF<sub>6</sub>)<sub>2</sub> in [D<sub>3</sub>]MeCN (500 MHz, 298 K).

## SUPPORTING INFORMATION

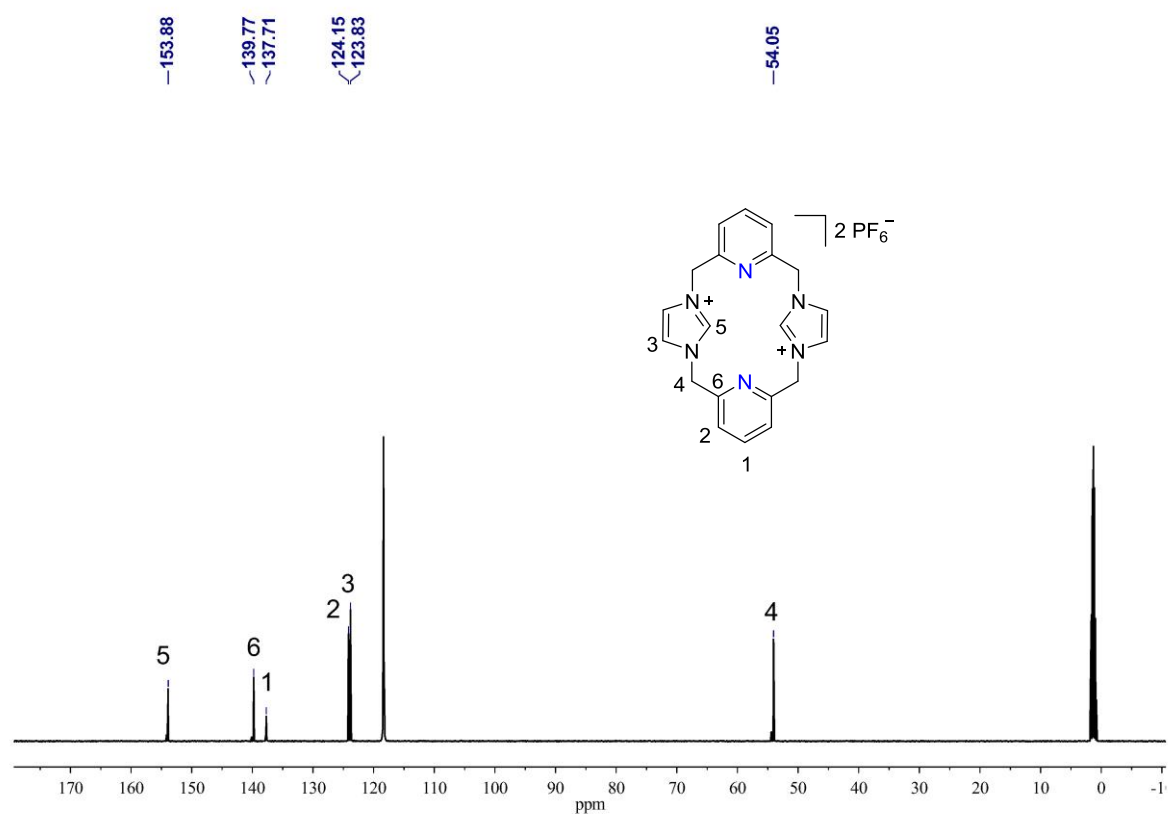

Figure S36.  $^{13}C$  NMR spectrum of  $[H_2L](PF_6)_2$  in  $[D_3]MeCN$  (125 MHz, 298 K).

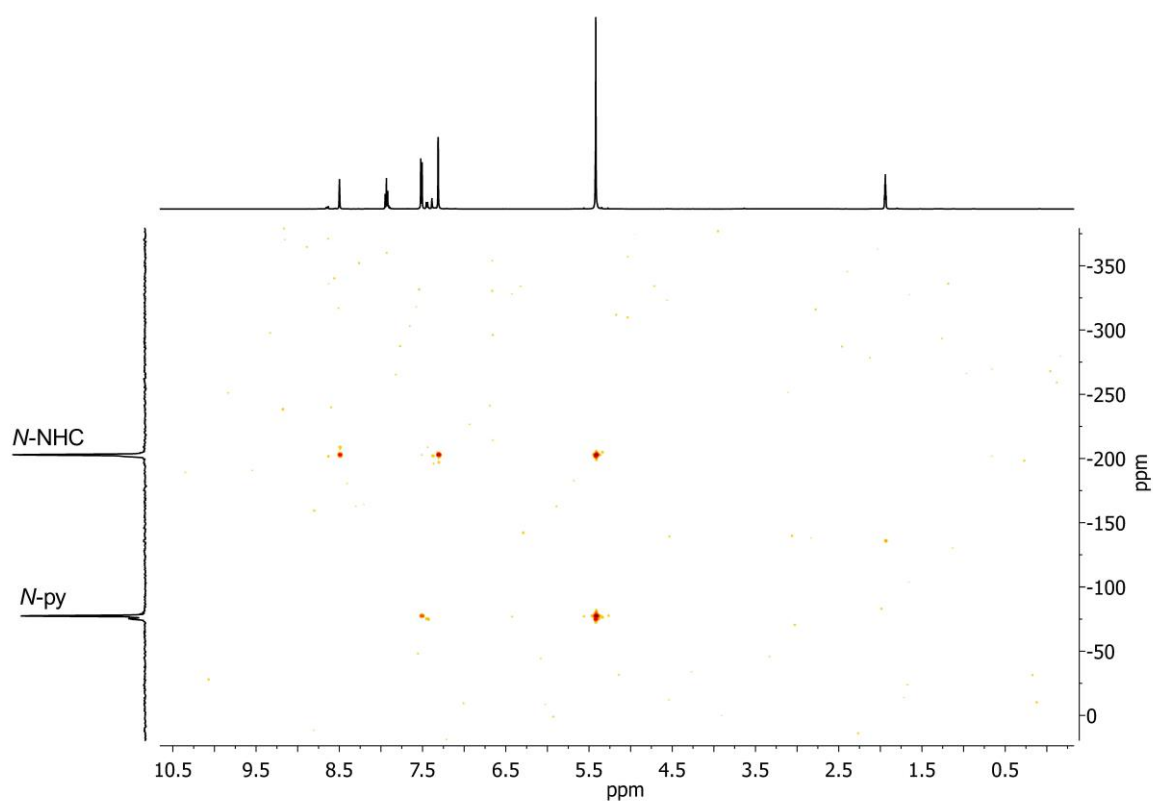

Figure S37.  $^1H$ - $^{15}N$  HMBC spectrum of  $[H_2L](PF_6)_2$  in  $[D_3]MeCN$  (500, 50 MHz, 298 K).

## SUPPORTING INFORMATION

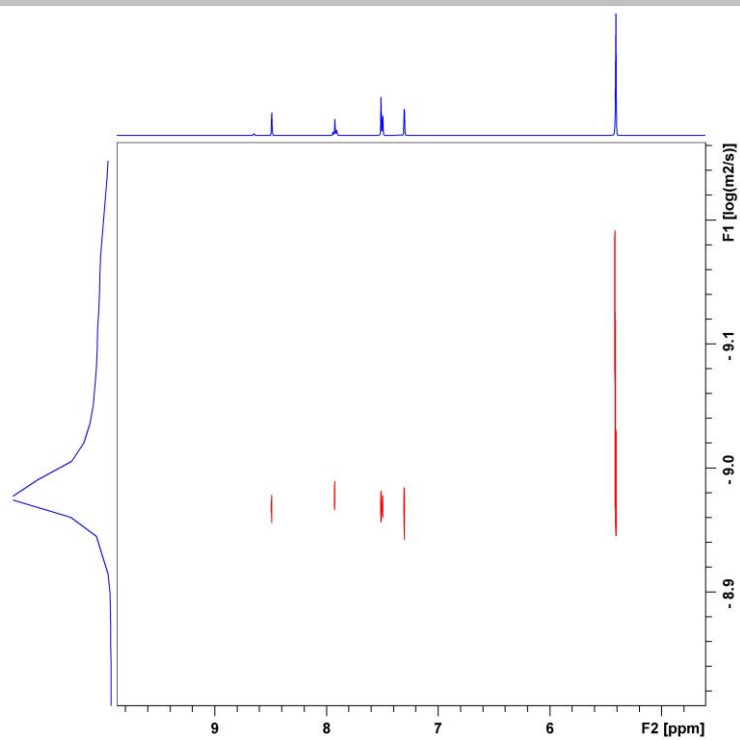

**Figure S38.** DOSY spectrum of  $[\text{H}_2\text{L}](\text{PF}_6)_2$  in  $[\text{D}_3]\text{MeCN}$  (500 MHz, 298 K) with the diffusion constant on the vertical axis.

## SUPPORTING INFORMATION

## 10. Variable-Temperature NMR Spectra

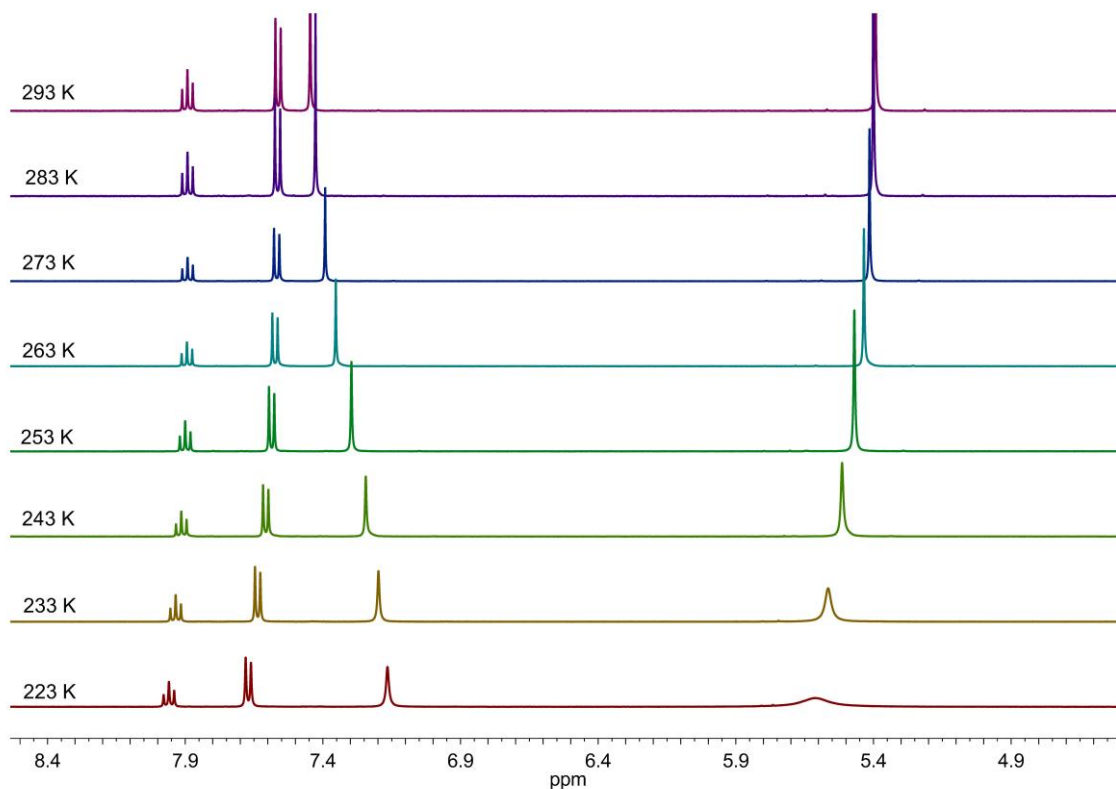

**Figure S39.** Variable-temperature  $^1\text{H}$  NMR spectra (4.5–8.5 ppm) of  $[\text{LCu}](\text{PF}_6)$  (**1**) in  $[\text{D}_6]\text{acetone}$  (400 MHz, temperature range from 293 K to 223 K). The shifts of these peaks are visible.

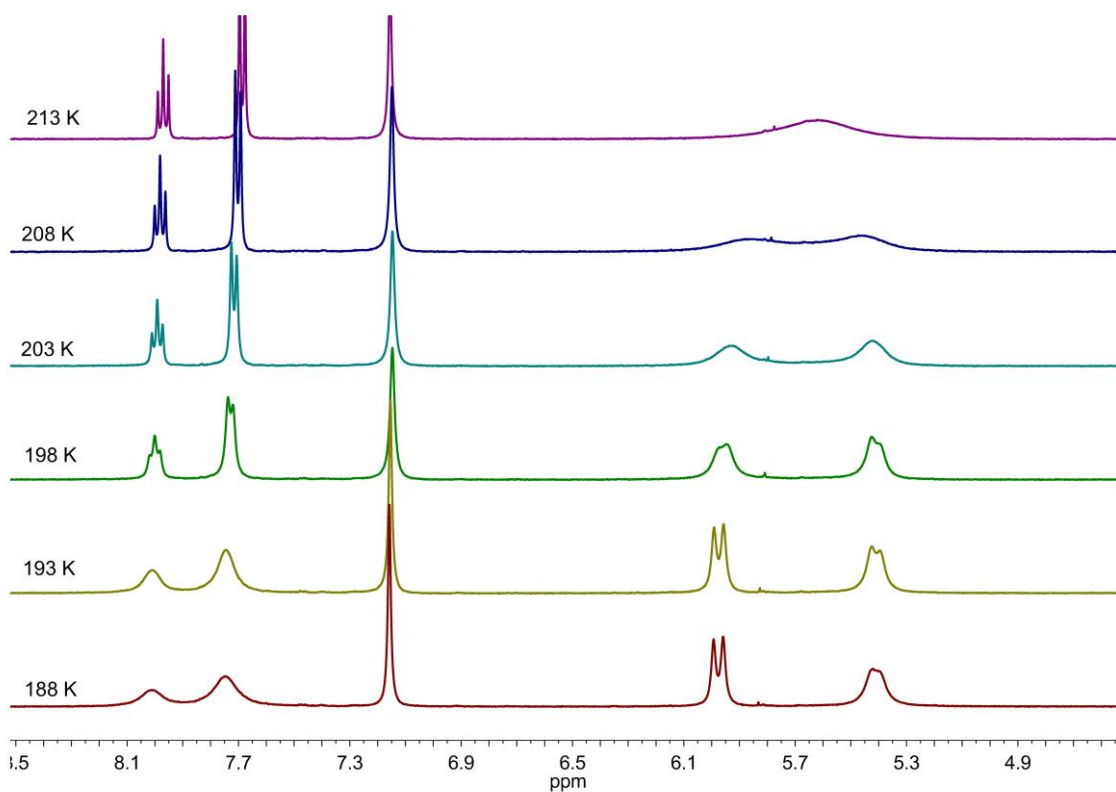

**Figure S40.** Variable-temperature  $^1\text{H}$  NMR spectra (4.5–8.5 ppm) of  $[\text{LCu}](\text{PF}_6)$  (**1**) in  $[\text{D}_6]\text{acetone}$  (400 MHz, temperature range from 213 K to 188 K). The dynamic behavior of  $\text{CH}_2$ -linkers is visible.

## SUPPORTING INFORMATION

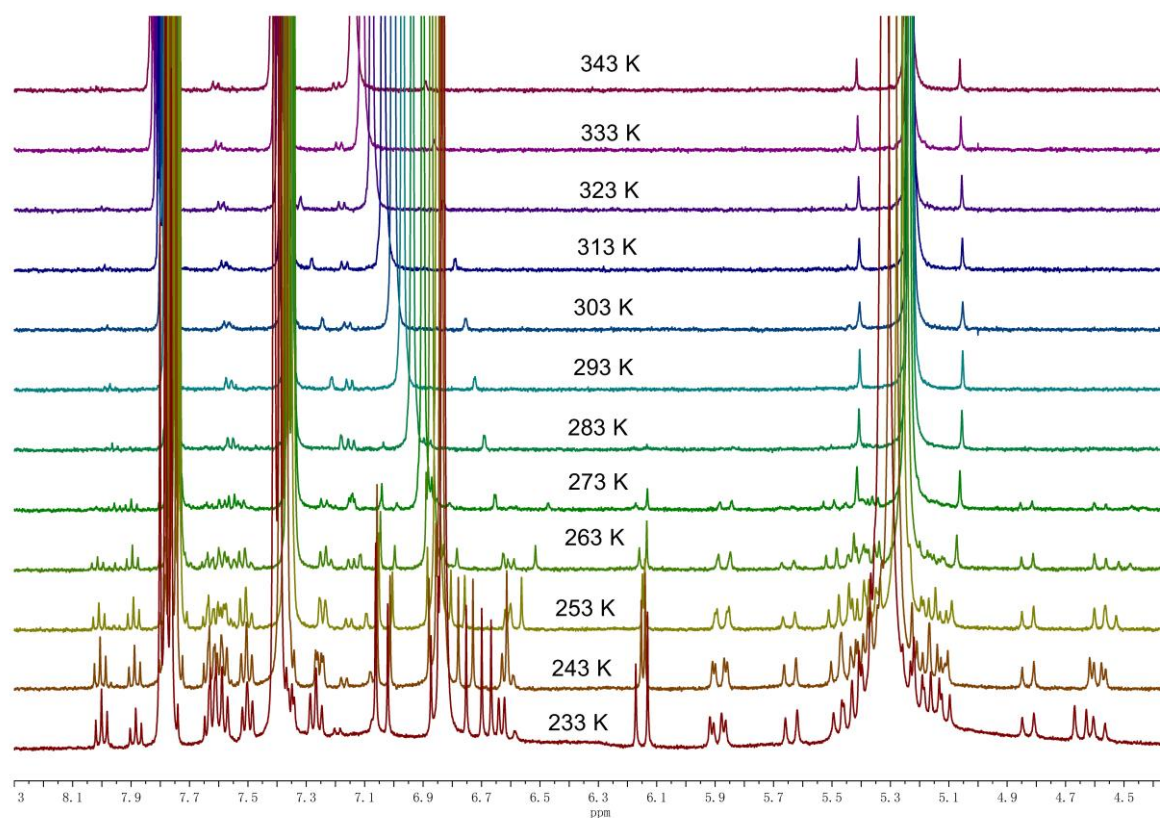

Figure S41. Variable-temperature  $^1\text{H}$  NMR spectra (4.3–8.3 ppm) of  $[\text{LCu}](\text{PF}_6)$  (1) in  $[\text{D}_3]\text{MeCN}$  (400 MHz, temperature range from 343 K to 233 K).

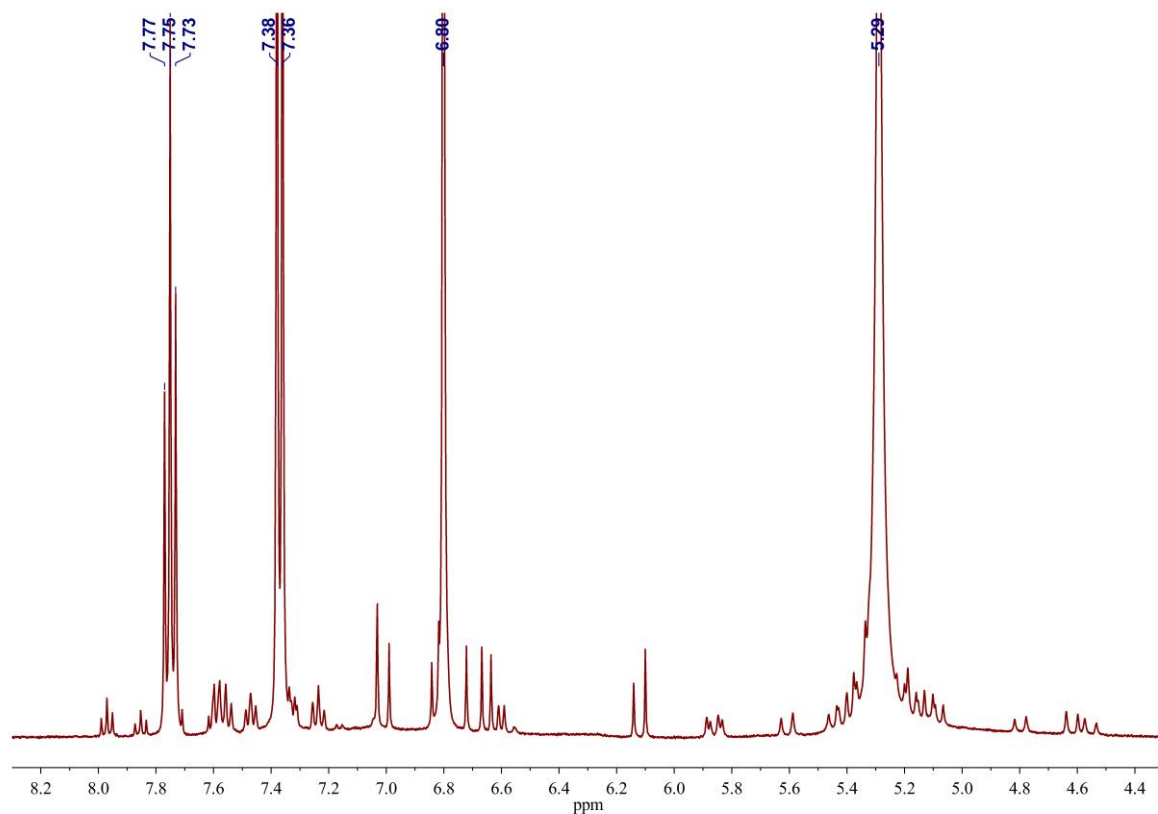

Figure S42.  $^1\text{H}$  NMR spectrum (4.3–8.3 ppm) of  $[\text{LCu}](\text{PF}_6)$  (1) in  $[\text{D}_3]\text{MeCN}$  at 233 K (400 MHz).



## SUPPORTING INFORMATION

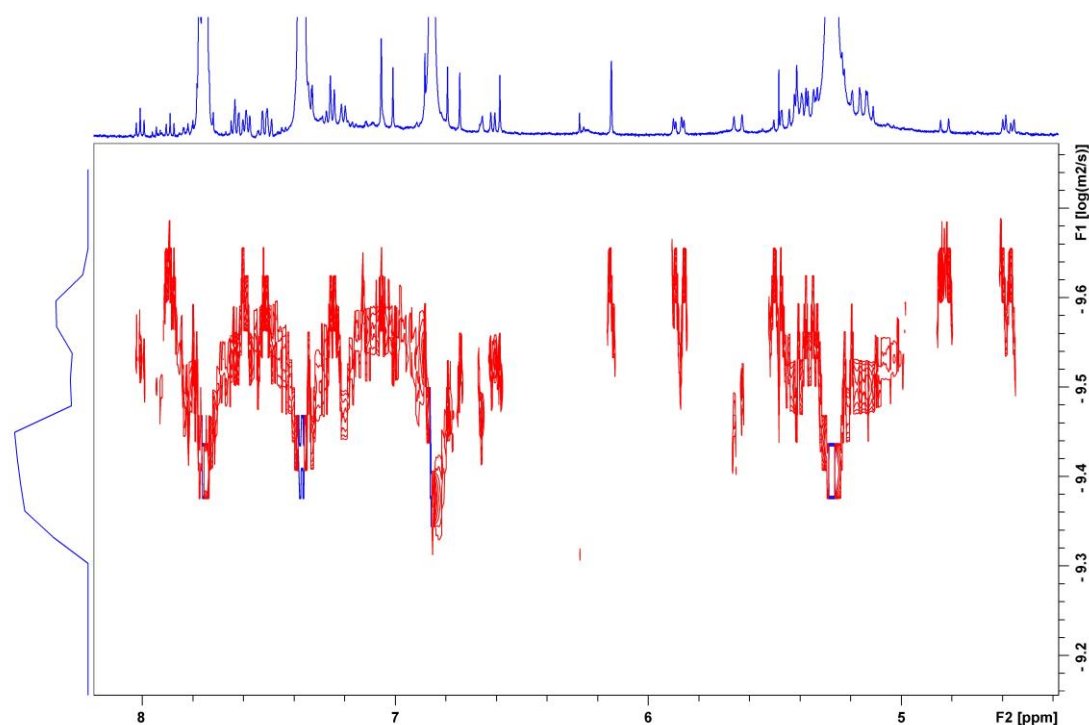

**Figure S43.** DOSY spectrum (4.3–8.3 ppm) of [LCu](PF<sub>6</sub>) (**1**) in [D<sub>3</sub>]MeCN (500 MHz, 233 K) with the diffusion constant on the vertical axis.

To determine thermodynamic parameters for the ring flip of **1**, the rate constants were calculated according to the formulas in literature.<sup>[15]</sup> The line width at half height was determined by using the line fitting function of MestReNova program. Ring flip was assumed to be frozen at 188 K in this case. The Gibbs free energy of activation  $\Delta^\ddagger G$  at coalescence temperature  $T_c$  can be calculated from equation (1). The calculations of thermodynamic parameters (activation energy, enthalpy and entropy) were done according to Arrhenius equation (2) and Eyring equation (3).

$$\Delta G^\ddagger = RT_c \left( \ln \frac{T_c}{k_c} + \ln \frac{k_B}{h} \right) \quad (1)$$

$$\ln k = -\frac{E_a}{R} \frac{1}{T} + \ln(A) \quad (2)$$

$$\ln \frac{k}{T} = -\frac{\Delta H^\ddagger}{R} \frac{1}{T} + \frac{\Delta S^\ddagger}{R} + \ln \frac{k_B}{h} \quad (3)$$

**Table S4.** Calculated values for rate constants  $k$  at different temperatures  $T$ .

| $T$ (K) | $k$ (s <sup>-1</sup> ) | $\ln k$ | $\ln(k \cdot T^{-1})$ |
|---------|------------------------|---------|-----------------------|
| 193     | 11.9                   | 2.477   | -2.786                |
| 198     | 36.8                   | 3.605   | -1.683                |
| 203     | 105.9                  | 4.663   | -0.651                |
| 208     | 358.3                  | 5.881   | 0.544                 |
| 210     | 513.3                  | 6.241   | 0.894                 |
| 213     | 894.4                  | 6.796   | 1.435                 |
| 223     | 6966.3                 | 8.849   | 3.442                 |
| 233     | 29991.9                | 10.309  | 4.858                 |

## SUPPORTING INFORMATION

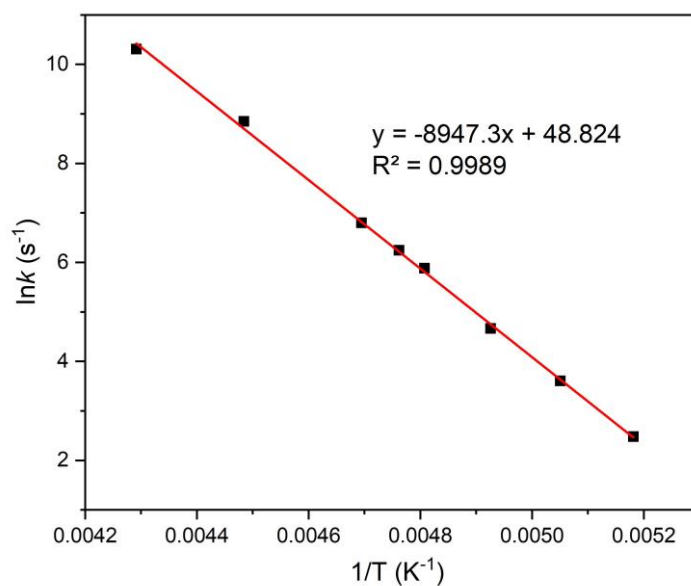

**Figure S44.** Arrhenius-plot for the determination of  $E_a$  of ring flip in 1. The following value was determined:  $E_a = 17.8 \pm 0.2$  kcal/mol.

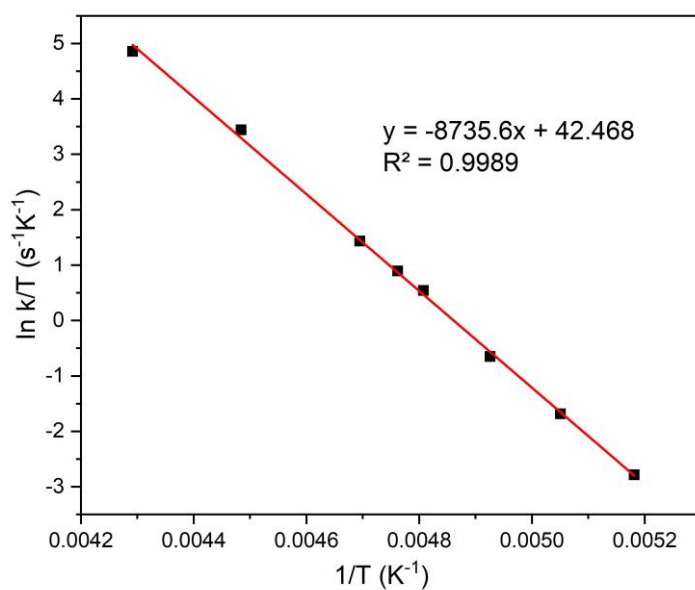

**Figure S45.** Eyring-plot for the determination of  $\Delta H^\ddagger$  and  $\Delta S^\ddagger$  of ring flip in 1. The following values were determined:  $\Delta H^\ddagger = 17.4 \pm 0.2$  kcal·mol<sup>-1</sup>,  $\Delta S^\ddagger = 37.2 \pm 1.1$  cal·mol<sup>-1</sup>·K<sup>-1</sup>.

## SUPPORTING INFORMATION

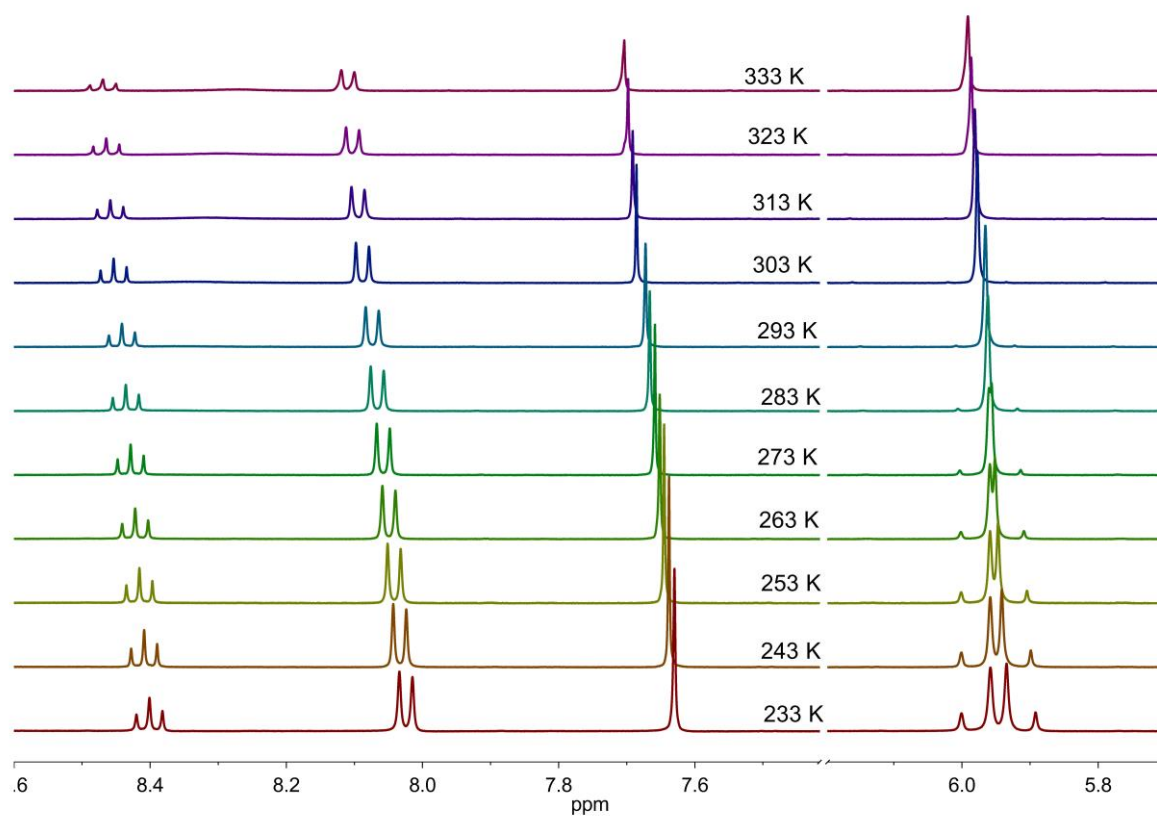

**Figure S46.** Variable-temperature <sup>1</sup>H NMR spectra (5.7–6.2 ppm and 7.4–8.6 ppm) of [LCu](PF<sub>6</sub>)<sub>2</sub>(SbF<sub>6</sub>) (3) in [D<sub>3</sub>]MeCN (400 MHz, temperature range from 333 K to 233 K).

## SUPPORTING INFORMATION

## 11. DFT calculations

The ring flip was investigated based on theoretical calculations. Besides the approximately  $C_{2v}$  symmetric **1** a second stable conformer with apparent  $C_{2h}$  symmetry has been considered (Figure S47, right). The energy difference between the two conformers is negligible ( $< 1$  kcal/mol). For the transition state, an energy difference of 8.2 kcal/mol was determined. In that case the pyridyl groups are more or less orthogonal and the apparent point group is reduced to  $C_s$ . Since the energy difference is not very high, it seems reasonable that fast ring flipping of the pyridyl groups occurs at elevated temperatures. The point group of the averaged (on the NMR time scale) molecular structure at room temperature would then be  $D_{2h}$  (i.e. all non-hydrogen atoms are in-plane), which would result in chemically equivalent methylene protons in the NMR spectra.

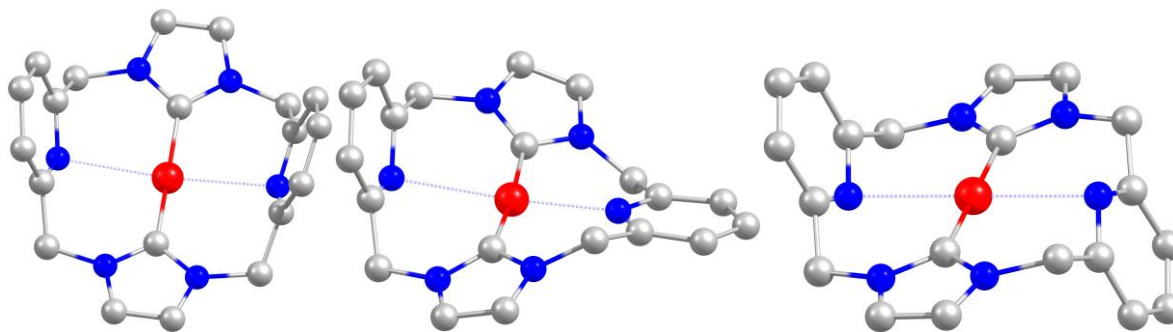

**Figure S47.** Calculated structures of **1**:  $C_{2v}$ , transition state ( $C_s$ ), and  $C_{2h}$  conformers (from left to right). Relative energies: 0, 8.19, and 0.34 kcal/mol (from left to right). Color code: Cu = red, N = blue, C = grey.

## SUPPORTING INFORMATION

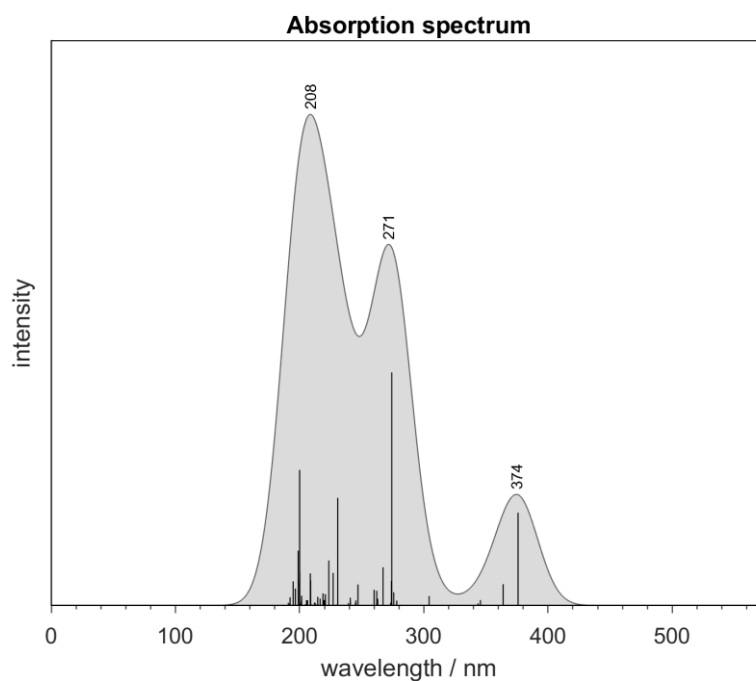

**Figure S48.** Calculated absorption spectra of the cation of **1**. The spectrum was convoluted using a Gaussian line shape function with a half-width of 20 nm.

**Table S5.** Selected TD-DFT (B3LYP/TZVP level) calculated energies, oscillator strengths, and compositions of the major electronic transitions of the cation of **1**.

| States | Energy (cm <sup>-1</sup> ) | Wavelength (nm) | Osc. Strength | Major contributions                             |
|--------|----------------------------|-----------------|---------------|-------------------------------------------------|
| 1      | 26600.9                    | 375.9           | 0.069980643   | HOMO → LUMO (MLCT, 100%)                        |
| 8      | 36463.7                    | 274.2           | 0.175891780   | H-1 → L+3 (MLCT, 82%), HOMO → L+5 (MLCT, 8%)    |
| 36     | 43347.9                    | 230.7           | 0.081178678   | H-6 → L+1 (MLCT, 62%), H-10 → L+2 (Ligand, 7%)  |
| 72     | 50005.0                    | 200.0           | 0.102282271   | HOMO → L+9 (MLCT, 71%), H-11 → L+2 (Ligand, 6%) |

## SUPPORTING INFORMATION

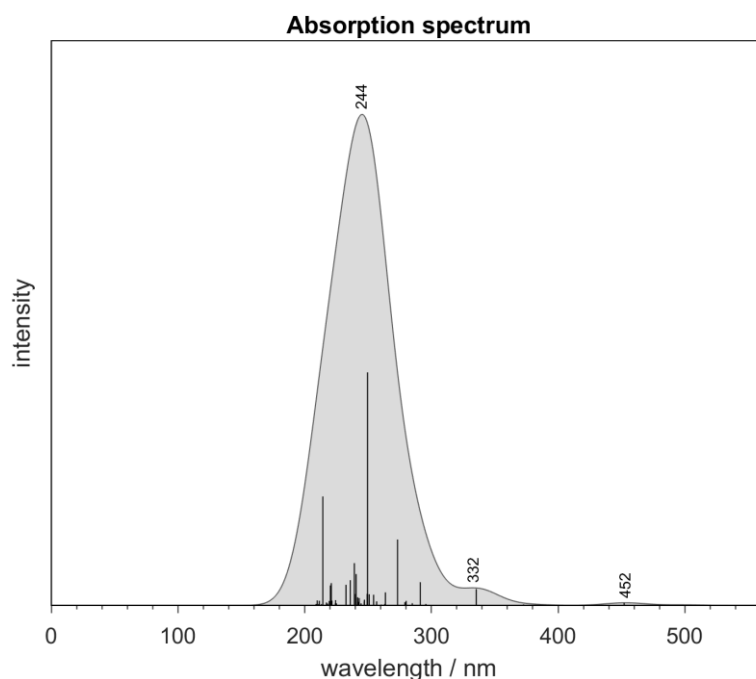

**Figure S49.** Calculated absorption spectra of the cation of **2**. The spectrum was convoluted using a Gaussian line shape function with a half-width of 20 nm.

**Table S6.** Selected TD-DFT (B3LYP/TZVP level) calculated energies, oscillator strengths, and compositions of the major electronic transitions of the cation of **2**.

| States | Energy (cm <sup>-1</sup> ) | Wavelength (nm) | Osc. Strength | Major contributions                                                                                            |
|--------|----------------------------|-----------------|---------------|----------------------------------------------------------------------------------------------------------------|
| 3      | 22120.7                    | 452.1           | 0.002741217   | H-12 (b) → HOMO (d-d, 46%), H-8 (b) → HOMO (LMCT, 22%), H-6 (b) → HOMO (LMCT, 19%)                             |
| 8      | 29816.7                    | 335.4           | 0.016772805   | H-1 (b) → HOMO (LMCT, 46%); H-8 (b) → HOMO (LMCT, 18%); H-6 (b) → HOMO (LMCT, 12%); H-14 (b) → HOMO (d-d, 10%) |
| 23     | 36595.9                    | 273.3           | 0.067341253   | H-6 (b) → HOMO (LMCT, 41%); H-14 (b) → HOMO (d-d, 15%); H-12 (b) → HOMO (d-d, 10%)                             |
| 36     | 40069.0                    | 249.6           | 0.237903151   | H-11 (b) → HOMO (LMCT, 56%); H-12 (b) → HOMO (d-d, 11%); H-8 (b) → HOMO (LMCT, 10%)                            |
| 72     | 46668.6                    | 214.3           | 0.111235250   | H-1 (a) → L+4 (a) (Ligand, 44%); H-1 (b) → L+4 (b) (Ligand, 36%)                                               |

## SUPPORTING INFORMATION

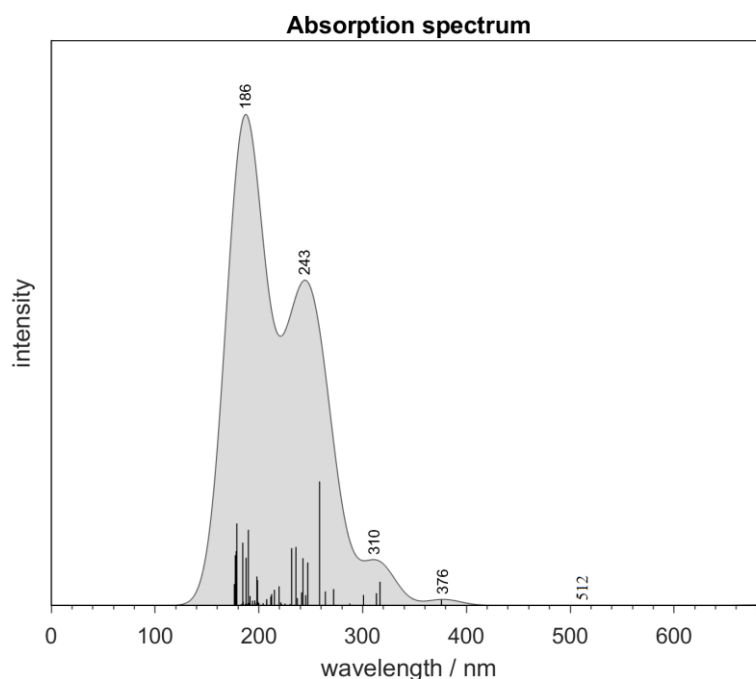

**Figure S50.** Calculated absorption spectra of the cation of **3**. The spectrum was convoluted using a Gaussian line shape function with a half-width of 20 nm.

**Table S7.** Selected TD-DFT (B3LYP/TZVP level) calculated energies, oscillator strengths, and compositions of the major electronic transitions of the cation of **3**.

| States | Energy (cm <sup>-1</sup> ) | Wavelength (nm) | Osc. Strength | Major contributions                                                                            |
|--------|----------------------------|-----------------|---------------|------------------------------------------------------------------------------------------------|
| 3      | 19522.7                    | 512.2           | 0.000601223   | H-3 → LUMO (LMCT, 91%), H-2 → LUMO (LMCT, 9%)                                                  |
| 7      | 26600.4                    | 375.9           | 0.015659098   | H-6 → LUMO (LMCT, 85%)                                                                         |
| 10     | 31579.9                    | 316.7           | 0.066042503   | H-8 → LUMO (LMCT, 64%), H-9 → LUMO (LMCT, 8%)                                                  |
| 19     | 38682.2                    | 258.5           | 0.345146572   | H-11 → LUMO (LMCT, 46%), H-9 → LUMO (LMCT, 15%), H-12 → LUMO (LMCT, 11%)                       |
| 20     | 40461.9                    | 247.1           | 0.119544732   | H-3 → L+1 (Ligand, 32%), H-21 → LUMO (d-d, 15%), H-20 → LUMO (d-d, 9%), H-12 → LUMO (LMCT, 7%) |
| 22     | 41230.3                    | 242.5           | 0.131725117   | H-3 → L+1 (Ligand, 50%), H-2 → L+2 (Ligand, 20%)                                               |
| 24     | 42423.5                    | 235.7           | 0.162963132   | H-2 → L+2 (Ligand, 50%), H-1 → L+4 (Ligand, 23%)                                               |
| 29     | 43175.8                    | 231.6           | 0.159393646   | H-1 → L+4 (Ligand, 71%), H-2 → L+2 (Ligand, 12%)                                               |

## SUPPORTING INFORMATION

**Table S8.** Comparison of the relative single-point energies obtained from the optimized geometries of **3** at different spin states.

| States                                    | RKS ( $S = 0$ ) | UKS ( $S = 0$ ) | UKS ( $S = 1$ ) | BS(1,1) |
|-------------------------------------------|-----------------|-----------------|-----------------|---------|
| $E_{\text{el}}$ (kcal·mol <sup>-1</sup> ) | 0               | 0               | +25.16          | +26.62  |

Broken-Symmetry calculations show that the high-spin state is the ground state with a coupling constant of  $J = 589 \text{ cm}^{-1}$  (according to Yamaguchi).<sup>[14]</sup> The energy gap between the broken-symmetry and high-spin states is  $\sim 1.69 \text{ kcal}\cdot\text{mol}^{-1}$ .

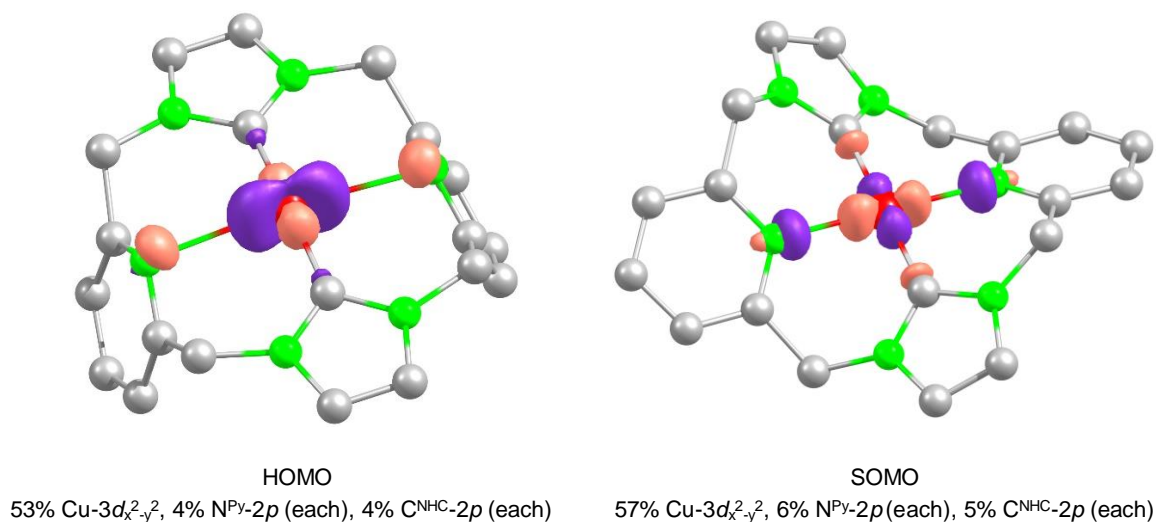

**Figure S51.** The HOMO of complex **1** ( $S = 0$ , left) and SOMO of complex **2** ( $S = 1/2$ , right), isodensity value = 0.08 au. The values of major orbital contributions are given. Color code: Cu = red, N = green, C = grey.

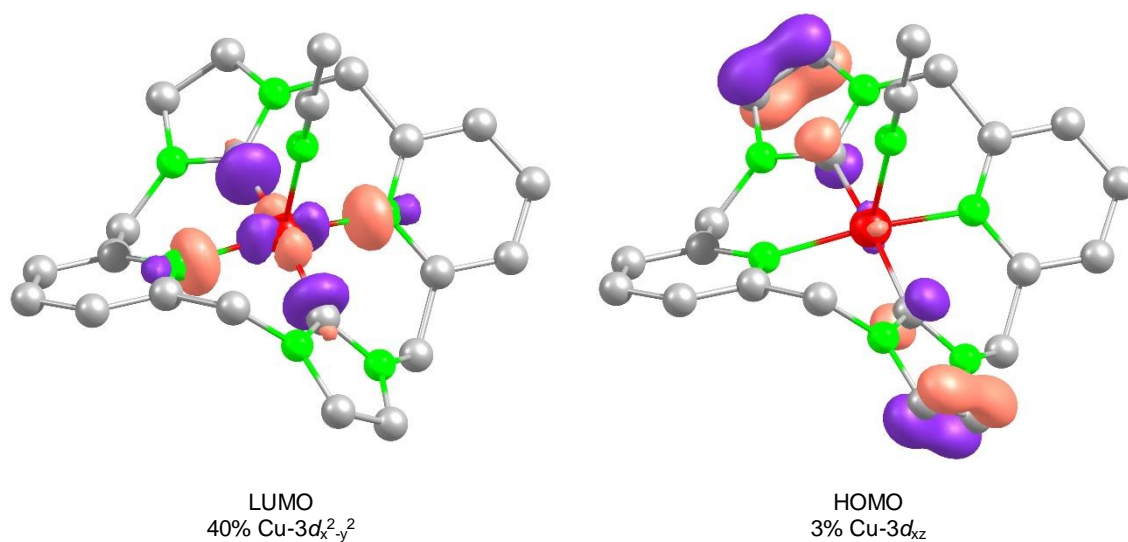

**Figure S52.** The LUMO and HOMO of complex **3** ( $S = 0$ ), isodensity value = 0.08 au. The values of  $d$ -orbital contribution are given. Color code: Cu = red, N = green, C = grey.



## SUPPORTING INFORMATION

**Table S9.** Selected LUMOs and HOMOs of **3** in the singlet state ( $S = 0$ ). Orbital energies and metal  $d$ -orbital contributions according to the Loewdin reduced orbital populations per MO are given.

| Orbitals | Orbital energies (eV) | $d$ -orbital contributions (%)                  |
|----------|-----------------------|-------------------------------------------------|
| LUMO+2   | -10.888               | 1.4 $d_{yz}$                                    |
| LUMO+1   | -11.101               | 0.8 $d_{xy}$ , 1.4 $d_z^2$                      |
| LUMO     | -13.378               | 39.5 $d_{x^2-y^2}$ , 0.1 $d_z^2$                |
| HOMO     | -15.988               | 3.2 $d_{xz}$                                    |
| HOMO-1   | -16.040               | 1.0 $d_{xy}$ , 0.6 $d_z^2$                      |
| HOMO-2   | -16.611               | 0                                               |
| HOMO-3   | -16.614               | 0                                               |
| HOMO-4   | -17.379               | 1.5 $d_{yz}$                                    |
| HOMO-5   | -17.468               | 1.2 $d_{yz}$                                    |
| HOMO-6   | -17.480               | 2.7 $d_z^2$ , 0.1 $d_{x^2-y^2}$ , 0.4 $d_{xy}$  |
| HOMO-7   | -17.563               | 0.2 $d_z^2$ , 0.4 $d_{x^2-y^2}$ , 0.6 $d_{xy}$  |
| HOMO-8   | -18.035               | 2.5 $d_{xz}$ , 0.1 $d_{yz}$                     |
| HOMO-11  | -18.5126              | 35.4 $d_z^2$ , 0.1 $d_{x^2-y^2}$ , 0.2 $d_{xy}$ |

## SUPPORTING INFORMATION

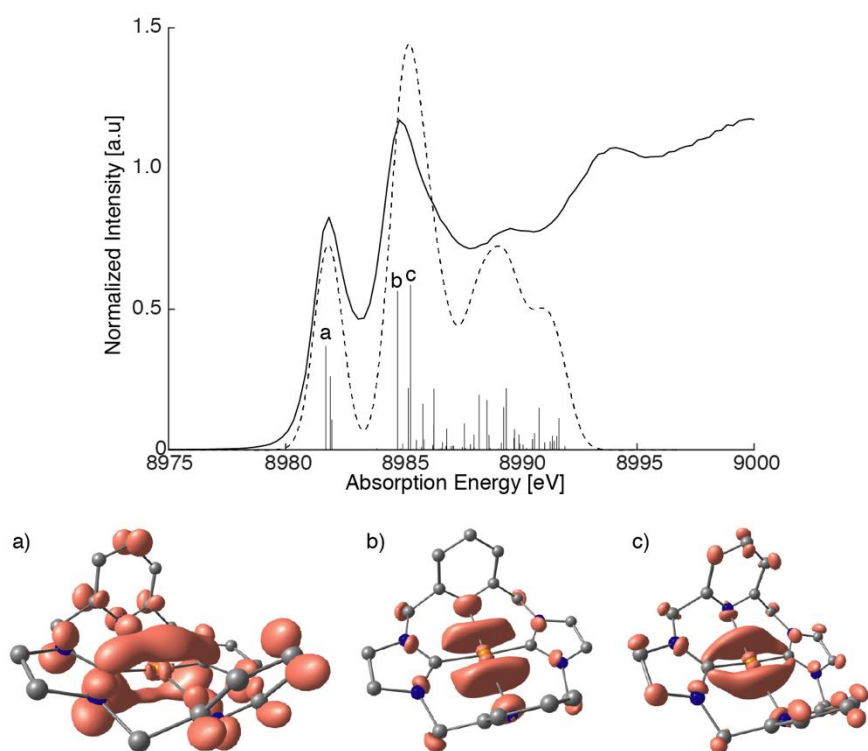

**Figure S53.** Cu K $\beta$  HERFD-XAS of **1** (solid) and calculated TD-DFT spectrum (dashed) with individual transitions (sticks). Transition difference density plots of selected transitions are plotted below with an isosurface value of 0.002 au. The calculated spectrum is shifted by +186.7 eV. Note, this is 1.87 eV less than the shift applied to calculated spectra of **2** and **3** for the alignment of pre-edge features. Color code: C = grey, N = blue, Cu = red, hydrogens omitted.

## SUPPORTING INFORMATION

## References

- [1] a) J. C. Garrison, R. S. Simons, J. M. Talley, C. Wesdemiotis, C. A. Tessier, W. J. Youngs, *Organometallics* **2001**, *20*, 1276; b) M. V. Baker, B. W. Skelton, A. H. White, C. C. Williams, *Organometallics* **2002**, *21*, 2674.
- [2] a) T. Tsuda, T. Yazawa, K. Watanabe, T. Fujii, T. Saegusa, *J. Org. Chem.* **1981**, *46*, 192; b) M. Ohashi, T. Adachi, N. Ishida, K. Kikushima, S. Ogoshi, *Angew. Chem. Int. Ed.* **2017**, *56*, 11911; *Angew. Chem.* **2017**, *129*, 12073.
- [3] G. J. Kubas, *Inorg. Synth.* **1990**, *28*, 68.
- [4] R. Breuer, M. Schmittel, *Organometallics* **2012**, *31*, 1870.
- [5] Y. Murata, F. Cheng, T. Kitagawa, K. Komatsu, *J. Am. Chem. Soc.* **2004**, *126*, 8874.
- [6] E. Bill, *JulX, Program for Simulation of Molecular Magnetic Data*, Max-Planck Institute for Chemical Energy Conversion, Mülheim/Ruhr, **2008**.
- [7] a) G. R. Hanson, K. E. Gates, C. J. Noble, M. Griffin, A. Mitchell, S. Benson, *J. Inorg. Biochem.* **2004**, *98*, 903; b) S. Stoll, A. Schweiger, *J. Magn. Reson.* **2006**, *178*, 42.
- [8] a) G. M. Sheldrick, *Acta Cryst.* **2015**, *A71*, 3; b) G. M. Sheldrick, *Acta Cryst.* **2015**, *C71*, 3.
- [9] *X-RED*; STOE & CIE GmbH, Darmstadt, Germany, **2002**.
- [10] P. Chandrasekaran, S. C. E. Stieber, T. J. Collins, L. Que, F. Neese, S. DeBeer, *Dalton. Trans.* **2011**, *40*, 11070.
- [11] F. Neese, *WIREs Comput. Mol. Sci.* **2012**, *2*, 73.
- [12] a) A. Schäfer, H. Horn, R. Ahlrichs, *J. Chem. Phys.* **1992**, *97*, 2571; b) F. Weigend, R. Ahlrichs, *Phys. Chem. Chem. Phys.* **2005**, *7*, 3297.
- [13] S. Grimme, J. Antony, S. Ehrlich, S., H. Krieg, *J. Chem. Phys.* **2010**, *132*, 154104.
- [14] a) K. Yamaguchi, Y. Takahara, T. Fueno in *Applied Quantum Chemistry* (Ed.: V. H. Smith), Reidel, Dordrecht, **1986**, 155; b) T. Soda, Y. Kitagawa, T. Onishi, Y. Takano, Y. Shigeta, H. Nagao, Y. Yoshioka, K. Yamaguchi, *Chem. Phys. Lett.* **2000**, *319*, 223.
- [15] a) F. P. Gasparro, N. H. Kolodny, *J. Chem. Educ.* **1977**, *54*, 258; b) J. Sandström in *Dynamic NMR Spectroscopy*, Academic Press, London, **1982**; c) P. J. Garratt, S. N. Thorn, R. Wrigglesworth, *Tetrahedron* **1994**, *50*, 12211.
